# Supplementary material for: Prevalence of vitamin D deficiency in Africa: a systematic review and meta-analysis
Source: PubMed Central journal article supplement (PMC7024961; doi:10.1016/s2214-109x(19)30457-7), 2019-11-27
Supplement: mmc2.pdf [file mmc2.pdf]

# THE LANCET

## Global Health

### Supplementary appendix

This appendix formed part of the original submission and has been peer reviewed.  
We post it as supplied by the authors.

Supplement to: Mogire RM, Mutua A, Kimita W, et al. Prevalence of vitamin D deficiency in Africa: a systematic review and meta-analysis. *Lancet Glob Health* 2019; published online Nov 27. [http://dx.doi.org/10.1016/S2214-109X\(19\)30457-7](http://dx.doi.org/10.1016/S2214-109X(19)30457-7).

Appendix 2

**Supplementary Table 1. Keywords used to search databases.**

| Database                          | Search terms                                                                                                                                                                                                                                                                                                                                                                                                                                                                                                                                                                                                                                                                                                                                                                                                                                                                                                                                                                                                                                                                                                                                                                                                                                                                                                                                                                                                                                   |
|-----------------------------------|------------------------------------------------------------------------------------------------------------------------------------------------------------------------------------------------------------------------------------------------------------------------------------------------------------------------------------------------------------------------------------------------------------------------------------------------------------------------------------------------------------------------------------------------------------------------------------------------------------------------------------------------------------------------------------------------------------------------------------------------------------------------------------------------------------------------------------------------------------------------------------------------------------------------------------------------------------------------------------------------------------------------------------------------------------------------------------------------------------------------------------------------------------------------------------------------------------------------------------------------------------------------------------------------------------------------------------------------------------------------------------------------------------------------------------------------|
| PubMed/<br>MEDLINE*               | ("Vitamin D"[Mesh] OR "Vitamin D Deficiency"[Mesh] OR "Cholecalciferol"[Mesh] OR "25-Hydroxyvitamin D 2"[Mesh] OR "Calcifediol"[Mesh] OR "Ergocalciferols"[Mesh]) AND ("African Continental Ancestry Group"[Mesh] OR "Algeria"[Mesh] OR "Egypt"[Mesh] OR "Libya"[Mesh] OR "Morocco"[Mesh] OR "South Sudan"[Mesh] OR "Sudan"[Mesh] OR "Tunisia"[Mesh] OR "Burundi"[Mesh] OR "Comoros"[Mesh] OR "Djibouti"[Mesh] OR "Eritrea"[Mesh] OR "Ethiopia"[Mesh] OR "Kenya"[Mesh] OR "Madagascar"[Mesh] OR "Malawi"[Mesh] OR "Mauritius"[Mesh] OR "Comoros"[Mesh] OR "Mozambique"[Mesh] OR "Reunion"[Mesh] OR "Rwanda"[Mesh] OR "Seychelles"[Mesh] OR "Somalia"[Mesh] OR "Tanzania"[Mesh] OR "Uganda"[Mesh] OR "Zambia"[Mesh] OR "Zimbabwe"[Mesh] OR "Benin"[Mesh] OR "Burkina Faso"[Mesh] OR "Cabo Verde"[Mesh] OR "Cote d'Ivoire"[Mesh] OR "Gambia"[Mesh] OR "Ghana"[Mesh] OR "Guinea"[Mesh] OR "Guinea-Bissau"[Mesh] OR "Liberia"[Mesh] OR "Mali"[Mesh] OR "Mauritania"[Mesh] OR "Niger"[Mesh] OR "Nigeria"[Mesh] OR "Atlantic Islands"[Mesh] OR "Senegal"[Mesh] OR "Sierra Leone"[Mesh] OR "Togo"[Mesh] OR "Angola"[Mesh] OR "Cameroon"[Mesh] OR "Central African Republic"[Mesh] OR "Chad"[Mesh] OR "Congo"[Mesh] OR "Democratic Republic of the Congo"[Mesh] OR "Equatorial Guinea"[Mesh] OR "Gabon"[Mesh] OR "Sao Tome and Principe"[Mesh] OR "Botswana"[Mesh] OR "Lesotho"[Mesh] OR "Namibia"[Mesh] OR "South Africa"[Mesh] OR "Swaziland"[Mesh]) |
| Web of Science                    | ts = (" vitamin D" and ("Algeria" or " Egypt" or " Libya" or " Morocco" or " South Sudan" or " Sudan" or " Tunisia" or " Western Sahara" or " Burundi" or " Comoros" or " Djibouti" or " Eritrea" or " Ethiopia" or " Kenya" or " Madagascar" or " Malawi" or " Mauritius" or " Comoros" or " Mozambique" or " Reunion" or " Rwanda" or " Seychelles" or " Somalia" or " Tanzania" or " Uganda" or " Zambia" or " Zimbabwe" or " Benin" or " Burkina Faso" or " Cape Verde" or " Cote d'Ivoire " or " Ivory Coast" or " Gambia" or " Ghana" or " Guinea" or " Guinea-Bissau" or " Liberia" or " Mali" or " Mauritania" or " Niger" or " Nigeria" or "Atlantic Islands" or " Senegal" or " Sierra Leone" or " Togo" or " Angola" or " Cameroon" or " Central African Republic" or " Chad" or " Congo" or " Democratic Republic of the Congo" or " Equatorial Guinea" or " Gabon" or " Sao Tome and Principe" or " Botswana" or " Lesotho" or " Namibia" or " South Africa" or " Swaziland"))                                                                                                                                                                                                                                                                                                                                                                                                                                                    |
| Embase                            | (( " vitamin D" and ("Algeria" or " Egypt" or " Libya" or " Morocco" or " South Sudan" or " Sudan" or " Tunisia" or " Western Sahara" or " Burundi" or " Comoros" or " Djibouti" or " Eritrea" or " Ethiopia" or " Kenya" or " Madagascar" or " Malawi" or " Mauritius" or " Comoros" or " Mozambique" or " Reunion" or " Rwanda" or " Seychelles" or " Somalia" or " Tanzania" or " Uganda" or " Zambia" or " Zimbabwe" or " Benin" or " Burkina Faso" or " Cape Verde" or " Cote d'Ivoire " or " Ivory Coast" or " Gambia" or " Ghana" or " Guinea" or " Guinea-Bissau" or " Liberia" or " Mali" or " Mauritania" or " Niger" or " Nigeria" or "Atlantic Islands" or " Senegal" or " Sierra Leone" or " Togo" or " Angola" or " Cameroon" or " Central African Republic" or " Chad" or " Congo" or " Democratic Republic of the Congo" or " Equatorial Guinea" or " Gabon" or " Sao Tome and Principe" or " Botswana" or " Lesotho" or " Namibia" or " South Africa" or " Swaziland")) not "African American").mp. [mp=title, abstract, heading word, drug trade name, original title, device manufacturer, drug manufacturer, device trade name, keyword, floating subheading word, candidate term word]                                                                                                                                                                                                                                    |
| African Journals<br>OnLine (AJOL) | "vitamin D" and ("Algeria" or "Egypt" or "Libya" or "Morocco" or "South Sudan" or "Sudan" or "Tunisia" or "Western Sahara" or "Burundi" or "Comoros" or "Djibouti" or "Eritrea" or "Ethiopia" or "Kenya" or "Madagascar" or "Malawi" or "Mauritius" or "Mayotte" or "Mozambique" or "Reunion" or "Rwanda" or "Seychelles" or "Somalia" or "Tanzania" or "Uganda" or "Zambia" or "Zimbabwe" or "Benin" or "Burkina Faso" or "Cape Verde" or "Cote d'Ivoire" or "Ivory Coast" or "Gambia" or "Ghana" or "Guinea" or "Guinea-Bissau" or "Liberia" or "Mali" or "Mauritania" or "Niger" or "Nigeria" or "Atlantic Islands" or "Senegal" or "Sierra Leone" or "Togo" or "Angola" or "Cameroon" or vitamin D" and (" Central African Republic" or "Chad" or "Congo" or "Democratic Republic of the Congo" or "Equatorial Guinea" or "Gabon" or "Sao Tome and Principe" or "Botswana" or "Lesotho" or "Namibia" or "South Africa" or "Swaziland") not "African American"                                                                                                                                                                                                                                                                                                                                                                                                                                                                              |
| African Index<br>Medicus          | "vitamin D"                                                                                                                                                                                                                                                                                                                                                                                                                                                                                                                                                                                                                                                                                                                                                                                                                                                                                                                                                                                                                                                                                                                                                                                                                                                                                                                                                                                                                                    |

\*Country names were also searched without their "Mesh" terms in PubMed.

**Supplementary Table 2. Sources of heterogeneity assessed using meta-regression analyses (mean 25(OH)D levels in 107 studies)**

| Factors                                              | Number of studies (%) | Pooled 25(OH)D mean (nmol/L) | 95% CI      | P value | Residual $I^2$ * | Percentage change in $I^2$ |
|------------------------------------------------------|-----------------------|------------------------------|-------------|---------|------------------|----------------------------|
| <b>Age groups</b>                                    |                       |                              |             |         |                  |                            |
| • Newborns                                           | 11 (10%)              | 50.8                         | 35.4, 66.3  | 0.12    | 99.82%           | 9%                         |
| • Children                                           | 29 (27%)              | 72.3                         | 38.7, 105.9 |         |                  |                            |
| • Non-pregnant adults                                | 56 (52%)              | 69.3                         | 36.9, 101.6 |         |                  |                            |
| • Pregnant/newborn mothers                           | 12 (11%)              | 65.8                         | 28.9, 102.6 |         |                  |                            |
| <b>Geographical Region</b>                           |                       |                              |             |         |                  |                            |
| • Sub-Saharan Africa (West, East and Central Africa) | 52 (49%)              | 74.30                        | 56.0, 92.60 | 0.025   | 99.90%           | 1%                         |
| • North Africa                                       | 42 (39%)              | 59.7                         | 51.9, 67.5  |         |                  |                            |
| • South Africa                                       | 16 (15%)              | 68.2                         | 44.5, 91.9  |         |                  |                            |
| <b>Setting</b>                                       |                       |                              |             |         |                  |                            |
| • Rural                                              | 16 (29%)              | 74.4                         | 62.6, 86.1  | 0.26    | 99.90%           | 1%                         |
| • Urban                                              | 54 (71%)              | 66.7                         | 41.5, 91.8  |         |                  |                            |
| <b>Assay</b>                                         |                       |                              |             |         |                  |                            |
| • CLIA                                               | 23 (26%)              | 60.0                         | 50.2, 69.8  | 0.018   | 99.86%           | 5%                         |
| • CPBA                                               | 4 (4%)                | 60.8                         | 25.4, 96.1  |         |                  |                            |
| • EIA                                                | 5 (6%)                | 86.2                         | 52.9, 119.4 |         |                  |                            |
| • ELISA                                              | 22 (21%)              | 66.5                         | 42.6, 90.4  |         |                  |                            |
| • HPLC                                               | 10 (9%)               | 84.6                         | 56.9, 112.2 |         |                  |                            |
| • LC-MS/MS                                           | 10 (9%)               | 79.9                         | 52.3, 107.5 |         |                  |                            |
| • RIA                                                | 23 (21%)              | 59.6                         | 35.9, 83.3  |         |                  |                            |
| <b>Risk of bias</b>                                  |                       |                              |             |         |                  |                            |
| • High risk of bias                                  | 2 (2%)                | 24.2                         | -11.4, 59.8 | 0.039   | 99.89%           | 2%                         |
| • Moderate risk of bias                              | 67 (62%)              | 71.3                         | -0.8, 143.4 |         |                  |                            |
| • Low risk of bias                                   | 39 (36%)              | 67.1                         | -4.7, 138.8 |         |                  |                            |

\* $I^2$ , measure of heterogeneity. Summary unadjusted  $I^2 = 99.91\%$ ; Percentage change in  $I^2$  computed as: (Summary unadjusted  $I^2$  - Residual  $I^2$ ) / Summary unadjusted  $I^2 \times 100$

**Supplementary Table 3. Sensitivity analyses. Meta-analysis of mean 25(OH)D levels excluding specific study groups**

| Study category excluded                             | Number of studies (%) | Pooled 25(OH)D mean (nmol/L) | 95% CI     | $I^2$ * |
|-----------------------------------------------------|-----------------------|------------------------------|------------|---------|
| <b>All studies (none excluded)</b>                  | 107 (100%)            | 67.8                         | 62.8, 72.8 | 99.91%  |
| <b>Excluding age groups;</b>                        |                       |                              |            |         |
| • Newborns                                          | 11 (10%)              | 69.7                         | 64.6, 74.9 | 99.87%  |
| • Pregnant mothers                                  | 12 (11%)              | 68.1                         | 62.9, 73.2 | 99.88%  |
| • Both pregnant mothers and newborns                | 23 (21%)              | 70.3                         | 65.0, 75.6 | 99.83%  |
| <b>Excluding African region;</b>                    |                       |                              |            |         |
| • Northern African countries                        | 42 (39%)              | 72.7                         | 62.8, 72.8 | 99.92%  |
| • Southern African countries                        | 16 (14%)              | 67.0                         | 61.4, 72.6 | 99.92%  |
| • Both Northern and Southern African countries      | 58 (53%)              | 72.8                         | 65.6, 80.1 | 99.94%  |
| <b>Excluding studies with high risk of bias;</b>    |                       |                              |            |         |
| • High risk of bias                                 | 2 (2%)                | 68.6                         | 63.7, 73.6 | 99.91%  |
| • Moderate risk of bias                             | 66 (62%)              | 70.0                         | 60.4, 77.6 | 99.95%  |
| • Both High and moderate risk of bias               | 68 (64%)              | 71.3                         | 62.9, 79.7 | 99.94%  |
| <b>Excluding studies with the following assays;</b> |                       |                              |            |         |
| • CLIA                                              | 23 (26%)              | 69.6                         | 63.9, 75.3 | 99.92%  |
| • CPBA                                              | 4 (4%)                | 67.7                         | 62.5, 72.8 | 99.91%  |
| • EIA                                               | 5 (6%)                | 66.4                         | 61.2, 71.5 | 99.91%  |
| • ELISA                                             | 22 (21%)              | 67.6                         | 61.9, 73.4 | 99.82%  |
| • HPLC                                              | 10 (9%)               | 65.4                         | 60.3, 70.4 | 99.89%  |
| • RIA                                               | 23 (21%)              | 69.8                         | 63.7, 75.9 | 99.92%  |
| <b>Excluding studies with;</b>                      |                       |                              |            |         |
| • n < 50                                            | 35 (32%)              | 70.4                         | 62.0, 78.8 | 99.18%  |
| • n < 100                                           | 61 (57%)              | 66.7                         | 60.0, 73.5 | 99.74%  |
| <b>Excluding studies published between;</b>         |                       |                              |            |         |
| • 1978 to 1989                                      | 3 (3%)                | 67.9                         | 62.8, 73.1 | 99.91%  |
| • 1978 to 1999                                      | 14 (13%)              | 70.3                         | 64.9, 75.8 | 99.91%  |
| • 1978 to 2009                                      | 24 (22%)              | 70.6                         | 64.7, 76.4 | 99.92%  |

\* $I^2$ , measure of heterogeneity <sup>a</sup>Vitamin D measurement assays; RIA: Radioimmunoassay; CLIA: Chemiluminescence immunoassays; HPLC–MS/MS high-performance liquid chromatography-tandem mass spectrometry; HPLC: high-performance liquid chromatography; EIA: Enzyme immunoassay; CPBA: competitive protein-binding assay.

**Supplementary Table 4. Summary characteristics of eligible studies (in chronological order)**

| Ist Author, year                       | City, country              | Eligible subjects (n)     | Male (%)* | Mean age (range/SD) in years* | Area of residence | Vitamin D measurement method <sup>9</sup> | Vitamin D mean (SD) / median (IQR) (nmol/L) <sup>€</sup> |
|----------------------------------------|----------------------------|---------------------------|-----------|-------------------------------|-------------------|-------------------------------------------|----------------------------------------------------------|
| <b>Children (≤ 17 Years)</b>           |                            |                           |           |                               |                   |                                           |                                                          |
| Velaphi 2019 <sup>1</sup> (newborns)   | Johannesburg, South Africa | 290                       | 0%        | 0                             | Urban             | CLIA                                      | 57.0 (29.7)                                              |
| Hassam 2019 <sup>2</sup>               | Dar es Salaam Tanzania     | 47                        | 53%       | 1                             | NA                | EIA                                       | 47.79                                                    |
| Houghton 2019 <sup>3</sup>             | Emali, Kenya               | Kamba: 287<br>Maasai: 213 | 50%       | 4 (3–5)                       | Rural             | LC–MS/MS                                  | Kaamba : 82.5 (80.7, 84.3)<br>Maasai: 95.7 (93.1, 98.3)  |
| Bodin 2019 <sup>4</sup>                | Addis Ababa, Ethiopia      | 95                        | 50%       | 4.3                           | Urban             | HPLC–MS/MS                                | 35.2                                                     |
| White 2019 <sup>5</sup>                | Pretoria, South Africa     | 84                        | 48%       | 8.5                           | Urban             | LC–MS/MS                                  | 68.1 (13.2)                                              |
| Owie 2018 <sup>6</sup> (newborns)      | Lagos, Nigeria             | 166                       | NA        | 0 (0)                         | Urban             | ELISA                                     | 63.4 (1.5)                                               |
| Youssef 2018 <sup>7</sup> (newborns)   | Egypt                      | 56                        | 0%        | NA                            | NA                | EIA                                       | NA                                                       |
| Omole 2018 <sup>8</sup>                | Ilesa, Nigeria             | 103                       | 64.1%     | 6.6 (7–14)                    | NA                | HPLC                                      | 127.8 (17.2)                                             |
| Sudfeld 2017 <sup>9</sup>              | Daresalaam, Tanzania       | 581                       | 48%       | 0.3 (0.1–0.5)                 | Urban             | HPLC–MS/MS                                | 1.5 months: 36.2 (18.5)<br>6 months: 64.9 (21.7)         |
| Ayadi 2016 <sup>10</sup> (newborns)    | Tunis, Tunisia             | 87                        | 45%       | 0 (0)                         | Rural and urban   | CLIA                                      | 14.8 (10.4)                                              |
| Jones 2016 <sup>11</sup>               | Nairobi, Kenya             | 22                        | 64%       | 1.1 (0.8–1.5)                 | Urban             | CLIA                                      | 70 (54–85)                                               |
| Bezrati 2016 <sup>12</sup>             | Tunis, Tunisia             | 225                       | NA        | 11 (7–16)                     | Urban             | CLIA                                      | 35.0 (12.7)                                              |
| Yamamah 2016 <sup>13</sup>             | South Sinai, Egypt         | 79                        | 52%       | 8.6 (4–12)                    | Rural             | ELISA                                     | NA                                                       |
| Toko 2016 <sup>14</sup> (newborns)     | Chulaimbo, Kenya           | 54                        | 57%       | 0 (0)                         | Rural             | EIA                                       | 64.9 (26.4)                                              |
| Boillat-Blanco 2016 <sup>15</sup>      | Kinondoni, Tanzania        | 358                       | 53%       | 0.5                           | NA                | CLIA                                      | 89.6 (26.9)                                              |
| Ludmir 2016 <sup>16</sup>              | Gaborone, Botswana         | 41                        | 41%       | 1                             | NA                | CLIA                                      | 77.1                                                     |
| Eltayeb 2015 <sup>17</sup>             | Assyout, Egypt             | 28                        | 65%       | 9.35 (7–14)                   | Urban             | ELISA                                     | 98.31 (3.5)                                              |
| Braithwaite 2015 <sup>18</sup>         | West Kiang, Gambia         | 237                       | 37%       | 11.9 (17–19)                  | Rural             | CLIA                                      | 59.6 (12.9)                                              |
| Sudfeld 2015 <sup>19</sup>             | Daresalaam, Tanzania       | 948                       | 54%       | 0.1 (0.1–0.1)                 | Urban             | HPLC–MS/MS                                | 45.2 (23)                                                |
| Poopedi 2015 <sup>20</sup>             | Johannesburg, South Africa | 99                        | 58%       | 15 (11–20)                    | Urban             | CLIA                                      | 56.4 (7.2)                                               |
| Wakayo 2015 <sup>21,22</sup>           | Ethiopia                   | 174                       | 43%       | 15 (11–18)                    | Rural and urban   | CLIA                                      | 54.5 (15.9)                                              |
| Abu Shady 2015 <sup>23</sup>           | Egypt                      | 200                       | 49%       | 10 (9–11)                     | NR                | ELISA                                     | 103.7 (33.2)                                             |
| Nabeta 2015 <sup>24</sup>              | Kampala, Uganda            | 41                        | 54%       | 1.3 (0.5–2.0)                 | Urban             | CLIA                                      | 80.4 (27.2)                                              |
| Cusick 2014 <sup>25</sup>              | Uganda                     | 20                        | 45%       | 3 (1–12)                      | Urban             | CLIA                                      | 63.1 (21.7)                                              |
| Djennane 2014 <sup>26</sup>            | Algeria                    | 435                       | 47%       | 10 (5–15)                     | Urban             | CLIA                                      | Summer: 71.4 (48.2–79.5)<br>Winter: 52.9 (39.4–75.6)     |
| El Rifai 2014 <sup>27</sup> (newborns) | Cairo, Egypt               | 135                       | 53%       | 0 (0)                         | Rural and urban   | ELISA                                     | 41.7 (25.0)                                              |
| El Sakka 2014 <sup>28</sup>            | Egypt                      | 96                        | 58%       | 1 (0.25)                      | NA                | RIA                                       | NA                                                       |
| Abd–Allah 2014 <sup>29</sup>           | Zagazig, Egypt             | 120                       | 40%       | 11 (7–17)                     | Urban             | ELISA                                     | 46.6 (13.5)                                              |
| Fares 2014 <sup>30</sup>               | Tunis, Tunisia             | 156                       | 51%       | 0                             | Urban             | RIA                                       | 29.8 (15.2)                                              |

|                                         |                             |     |       |                  |       |          |                     |
|-----------------------------------------|-----------------------------|-----|-------|------------------|-------|----------|---------------------|
| Thacher 2014 <sup>31</sup>              | Jos, Nigeria                | 257 | 50%   | (1–10)           | Urban | LC–MS/MS | 49.9 (7.5–127.3)    |
| Maalmi 2013 <sup>32</sup>               | Ariana, Tunisia             | 225 | 56%   | 9.5 (2–16)       | Rural | RIA      | 75.6 (14.9)         |
| Azab 2013 <sup>33</sup>                 | Zagazig, Egypt              | 40  | 43%   | 10.8 (6–16)      | Urban | ELISA    | 66.1 (12)           |
| Fahim 2013 <sup>34</sup>                | Assiut, Egypt               | 100 | NA    | 8 (4–15)         | NA    | ELISA    | 40.2 (12.3) pg/ml   |
| Luxwolda 2013 <sup>35</sup> (newborns)  | Tanzania                    | 82  | 60%   | 0                | Rural | LC–MS/MS | 79.0 (26.4)         |
| Amukele 2012 <sup>36</sup>              | Malawi                      | 21  | NA    | 0 (0–1)          | NA    | LC–MS/MS | 78.6 (10.4)         |
| Hamza 2011 <sup>37</sup>                | Cairo, Egypt                | 60  | 17%   | 13.10 (7.2–18.5) | Urban | ELISA    | 106.5 (23)          |
| Poopedi 2011 <sup>38</sup>              | Johannesburg, South Africa  | 295 | 78%   | 10.5             | Urban | CLIA     | 93.4 (32.8)         |
| Thacher 2010 <sup>39</sup>              | Jos, Nigeria                | 21  | 48%   | 3 (2–5)          | Urban | CLIA     | 67                  |
| Albanna 2010 <sup>40</sup>              | Zagazig, Egypt              | 40  | 50%   | 3 (2–5)          | Urban | EIA      | 87.25 (18.4)        |
| Nguema - Asseko 2005 <sup>41</sup>      | Oyem, Gabon                 | 28  | 56%   | 0 (0)            | Urban | NA       | 110.0 (42.5)        |
| Graff 2004 <sup>42</sup>                | Jos, Nigeria                | 15  | 40%   | 4 (2–8)          | Urban | CPBA     | 72.4 (11.5)         |
| Thacher 2000 <sup>43,44</sup>           | Jos, Nigeria                | 123 | 50%   | 4 (2–6)          | Urban | RIA      | 51.2 (15.5)         |
| Thacher 1999a <sup>45</sup>             | Jos, Nigeria                | 10  | NA    | 7 (1–8)          | Urban | RIA      | 52.2 (7.2)          |
| Pfitzner 1998 <sup>46</sup>             | Jos, Nigeria                | 198 | 45%   | 2.0 (0.5–3.0)    | Urban | RIA      | 64.9 (24)           |
| Cornish 2000 <sup>47</sup>              | N. Province, South Africa   | 58  | NA    | 12               | Rural | RIA      | 111.4 (9.1)         |
| Walter 1997 <sup>48</sup>               | Jos, Nigeria                | 27  | 70%   | 3 (1–7)          | Urban | RIA      | 59.9 (18.7)         |
| Sanchez 1997 <sup>49</sup> (newborns)   | Maiduguri, Nigeria          | 10  | 0%    | 0                | NA    | RIA      | 32.9 (19.3)         |
| Oginni 1996a <sup>50</sup>              | Ile-Ife, Nigeria            | 94  | 63%   | 3 (1–5)          | Urban | RIA      | 63 (2.6)            |
| Oginni 1996b <sup>51</sup>              | Ile-Ife, Nigeria            | 20  | 61%   | 3 (1–5)          | Urban | RIA      | 69 (22)             |
| Okonofua 1991 <sup>52</sup>             | Ile-Ife, Nigeria            | 12  | 75%   | 2                | Urban | RIA      | 41 (29–50)          |
| Okonofua 1986 <sup>53</sup> (newborns)  | Ife, Nigeria                | 30  | NA    | 0                | NA    | CPBA     | 49 (12.8)           |
| Markestad 1984 <sup>54</sup> (newborns) | Libya                       | 14  | NA    | 0                | NA    | NA       | 20 (10–45)          |
| <b>Adults (≥18 years)</b>               |                             |     |       |                  |       |          |                     |
| Velaphi 2019 <sup>1</sup> (mothers)     | Johannesburg, South Africa  | 290 | NA    | NA               | Urban | CLIA     | 41.9 (21.0)         |
| Oluwole 2019 <sup>55</sup>              | Lagos, Nigeria              | 206 | 0%    | 31               | Urban | ELISA    | 142.3 (112.3–164.7) |
| Azzam 2019 <sup>56</sup>                | Alexandria, Egypt           | 40  | 0%    | NA               | NA    | ELISA    | 40.3 (21.4)         |
| Cavalier 2019 <sup>57</sup>             | Abidjan, Ivory Coast        | 203 | 40%   | 37               | Urban | CLIA     | 64.6                |
| Chikwati 2019 <sup>58</sup>             | Harare, Zimbabwe            | 63  | 0%    | 26.6 (18–49)     | Urban | HPLC     | 100 ± 27.1          |
| Chutterpaul 2019 <sup>59</sup>          | KwaZulu-Natal, South Africa | 176 | 16.5% | 72.6             | NA    | HPLC     | 50.1 ± 23.3         |
| Gaffer 2019 <sup>60</sup>               | Khartoum, Sudan             | 180 | 0%    | 27.7             | Rural | CLIA     | 28.2 (23.5,36.2)    |
| Gernand 2019 <sup>61</sup>              | Asesewa, Ghana              | 98  | 0%    | 26.5 (18–35)     | Rural | LC–MS/MS | 65.1 (14.2)         |
| Younouss 2019 <sup>62</sup>             | Yaounde (Cameroon)          | 75  | 0%    | 27.6             | NA    | ELISA    | 46.1                |
| Owie 2018 <sup>6</sup> (mothers)        | Lagos, Nigeria              | 166 | NA    | 31.4 (18–42)     | Urban | ELISA    | 87.4 (2.0)          |

|                                     |                                   |     |      |                 |                          |          |                     |
|-------------------------------------|-----------------------------------|-----|------|-----------------|--------------------------|----------|---------------------|
| Myburgh 2018 <sup>63</sup>          | NW Province, South Africa         | 505 | 0%   | NA              | Rural and urban          | CLIA     | 68.2 (median)       |
| Kagotho 2018 <sup>64</sup>          | Nairobi, Kenya                    | 253 | 75%  | 33 (18–65)      | Urban                    | CLIA     | 69.4 (111.8)        |
| Faid 2018 <sup>65</sup>             | Misurata, Libya                   | 455 | 16%  | 33 (1–64)       | Urban                    | CLIA     | 52.8 (29.4)         |
| Ibrahim 2018 <sup>66</sup>          | Qena, Egypt                       | 20  | 50%  | 35.2            | NA                       | ELISA    | 76.7 (10.73)        |
| Ashenafi 2018 <sup>67</sup>         | Addis Ababa, Ethiopia             | 78  | 54%  | 29 (18–68)      | Urban                    | NA       | 35                  |
| Skalli 2018 <sup>68</sup>           | Rabat, Morocco                    | 146 | NA   | 33.6 (18–60)    | Urban                    | LC–MS/MS | 32.4 (16.4)         |
| Lahmar 2018 <sup>69</sup>           | Ariana, Tunisia                   | 154 | 43%  | 46.36           | NA                       | RIA      | 70.3 (11.7)         |
| Aké 2018 <sup>70</sup>              | Côte d'Ivoire                     | 163 | NA   | 18–49           | NA                       | HPLC     | 77.4 (3.9)          |
| Bahendeka 2018 <sup>71</sup>        | Uganda                            | 79  | 33%  | 17.3 (7.3–27.9) | NA                       | CLIA     | 99.6 (120.8)        |
| Bakeer 2018 <sup>72</sup>           | Egypt                             | 17  | 0%   | 26.2 (19–35)    | NA                       | ELISA    | 48.65 (27.30)       |
| Youssef 2018 <sup>7</sup> (mothers) | Egypt                             | 56  | 0%   | NA              | NA                       | EIA      | NA                  |
| Fondjo 2017 <sup>73</sup>           | Nkawie, Ghana                     | 100 | 22%  | 57.7            | Rural                    | ELISA    | 31.3 (6.5–81.8)     |
| Ali 2017 <sup>74</sup>              | Cairo, Egypt                      | 33  | 42%  | 35 (27–59)      | Urban                    | ELISA    | 90.1 (26.9–189.1)   |
| Musa 2018 <sup>75</sup>             | Khartoum, Sudan                   | 132 | 0%   | 27.6            | Rural and urban<br>Urban | CLIA     | 21.0 (18.0–27.7)    |
| Abdel Galil 2018 <sup>76</sup>      | Zagazig, Egypt                    | 100 | 0%   | 36.24           | NA                       | ELISA    | 114.4 (22.9)        |
| Bakeer 2018 <sup>72</sup>           | Egypt                             | 17  | 0%   | 26 (19–35)      | NA                       | ELISA    | 48.7 (27.3)         |
| Abdel–Mohsen 2018 <sup>53</sup>     | Alexindiria, Egypt                | 30  | NA   | NA              | Urban                    | ELISA    | 164.7 (7.5)         |
| Sotunde 2017 <sup>77</sup>          | NW Province, South Africa         | 209 | 0%   | 60 (43–80)      | Urban                    | CLIA     | 76.4 (23.4)         |
| Akinlade 2017 <sup>78</sup>         | Idadan, Nigeria                   | 30  | NA   | 35 (19–55)      | NA                       | ELISA    | 28.1 (5.6)          |
| Gbadegesin 2017 <sup>79</sup>       | Lagos, Nigeria                    | 461 | 0%   | 31.3 (4.4)      | NA                       | HPLC     | 130.3 (129.7)       |
| Derar 2017 <sup>80</sup>            | Khartoum, Sudan                   | 50  | NA   | 32 (18–60)      | NA                       | NA       | 51.1 (21.9)         |
| Fondjo 2017 <sup>73</sup>           | Nkawie, Ghana                     | 100 | 22%  | 58              | Rural                    | ELISA    | 31.3 (6.5,81.8)     |
| Musarurwa 2017 <sup>81</sup>        | Harare, Zimbabwe                  | 133 | 42%  | 35.1 (8.9)      | NA                       | CLIA     | 53.9 (45.7,66.1)    |
| Nielson 2016 <sup>82</sup>          | Keneba, The Gambia                | 17  | –    | 29 (25–39)      | Rural                    | EIA      | 20.1 (5.8) pM       |
| Lategan 2016 <sup>83</sup>          | Mangaung, South Africa            | 339 | 22%  | 44 (25–63)      | Urban                    | CLIA     | 96.8 (28)           |
| Ayadi 2016 <sup>10</sup> (mothers)  | Tunis, Tunisia                    | 87  | 0%   | 31 (19–42)      | Rural and urban          | CLIA     | 17.0 (12.8)         |
| El Maataoui 2016 <sup>84</sup>      | Morocco                           | 254 | 27%  | 60.5 (8.4)      | NA                       | CLIA     | 50.6 (21.5)         |
| Edem 2016 <sup>85</sup>             | Ibadan, Nigeria                   | 20  | NA   | NA              | Urban                    | HPLC     | 45.80 (13.30) pg/ml |
| Abbiyesuku 2016 <sup>86</sup>       | Ibadan, Nigeria                   | 49  | 100% | 54.50 (30–80)   | Urban                    | HPLC     | 107.2 (25.2)        |
| Toko 2016 <sup>14</sup> (mothers)   | Chulaimbo, Kenya                  | 63  | 0%   | 22.5            | Rural                    | EIA      | 77.0 (31.5)         |
| Aboelnaga 2016 <sup>87</sup>        | Dakalia, Egypt                    | 50  | 36%  | 39.5 (18–65)    | Rural                    | ELISA    | 60.4 (21.7)         |
| Van der Walt 2016 <sup>88</sup>     | Free State province, South Africa | 50  | 33%  | 39              | Rural and urban          | ELISA    | 45.9                |
| Azab 2016 <sup>89</sup>             | Zagazig, Egypt                    | 100 | 5%   | 11.5 (8–18)     | Urban                    | ELISA    | 84.1 (3.7)          |

|                                       |                            |                                         |                             |                          |                     |          |                                                               |
|---------------------------------------|----------------------------|-----------------------------------------|-----------------------------|--------------------------|---------------------|----------|---------------------------------------------------------------|
| Ben Fradj 2016 <sup>90</sup>          | Tunis, Tunisia             | 250                                     | 25%                         | 63.3 (29–91)             | Urban               | CLIA     | NA                                                            |
| Nasri 2016 <sup>91</sup>              | Tunis, Tunisia             | 64                                      | 0%                          | NA                       | Urban               | CLIA     | 28.3 (13-82)                                                  |
| Sobeih 2016 <sup>92</sup>             | Cairo, Egypt               | 75                                      | NA                          | 31.5 (14–65)             | Urban               | ELISA    | 71.9 (26.2)                                                   |
| Basson 2015 <sup>93</sup>             | Cape Town, SA              | 199                                     | 31%                         | 34.0 (24.0–44.3)         | Rural and urban     | CLIA     | 49.2 (42.4–59.7)                                              |
| Fattah 2015 <sup>94</sup>             | Cairo, Egypt               | 30                                      | 60%                         | 25.1 (19–50)             | Urban               | EIA      | 112.8 (51.2)                                                  |
| Botros 2015 <sup>95</sup>             | Cairo, Egypt               | 404                                     | 0%                          | 31.5 (8.2)               | NA                  | RIA      | 27.5 (4.0–62)                                                 |
| El Maataoui 2015 <sup>96</sup>        | Morocco                    | 73                                      | 0%                          | 59.8 (50.0–83.0)         | Urban               | CLIA     | 32.9 (23.8)                                                   |
| Kazem 2014 <sup>97</sup>              | Cairo, Egypt               | 30                                      | 0%                          | 48                       | Urban               | ELISA    | 68.3 (9.3)                                                    |
| Durazo–Arvizu 2014 <sup>98</sup>      | Kumasi, Ghana              | Ghana: 497                              | 50%                         | 34 (25–45)               | Ghana: rural        | LC–MS/MS | Ghana: 75.9 (6.9)                                             |
|                                       | Victoria, Seychelles       | Seychelles: 494                         |                             |                          | Seychelles: urban   |          | Seychelles: 72.9 (19.5)                                       |
|                                       | Cape Town, South Africa    | South Africa: 502                       |                             |                          | South Africa: urban |          | South Africa: 59.2 (20.7)                                     |
| George 2014 <sup>99,100</sup>         | Johannesburg, South Africa | Africans: 371<br>Asian–Indians: 343     | 48%                         | 42 (19–65)<br>44 (18–65) | Urban               | HPLC     | Africans: 64.9 (46.4–89.4)<br>Asian Indians: 41.2 (28.4–56.8) |
| Were 2014 <sup>101</sup>              | Mombasa, Kenya             | 15                                      | 60%                         | 26                       | Urban               | CLIA     | 76.6 (20.5)                                                   |
| Aly 2014 <sup>102</sup>               | Dakahlia, Egypt            | 176                                     | 40%                         | 68 (60–85)               | Rural               | EIA      | 92 (17)                                                       |
| El Rifai 2014 <sup>27</sup> (mothers) | Cairo, Egypt               | 135                                     | 0%                          | 26.0 (5.8)               | Rural and urban     | ELISA    | 81.4 (53.4)                                                   |
| Durazo–Arvizu 2013 <sup>103</sup>     | Nigeria                    | 100                                     | 0%                          | 31 (18–59)               | Rural and urban     | RIA      | 64 (17.4)                                                     |
| Hamill 2013 <sup>104</sup>            | Johannesburg, South Africa | 98                                      | 0%                          | 32 (18–49)               | Urban               | RIA      | 60 (16.5)                                                     |
| Luxwolda 2013 <sup>35</sup> (adults)  | Tanzania                   | Pregnant women: 138<br>Other adults: 60 | 60%                         | 34 (16–65)               | Rural               | LC–MS/MS | Pregnant women: 138.5 (35.0)<br>Other adults: 115.1 (27.0)    |
| George 2013 <sup>105</sup>            | Johannesburg, South Africa | Africans:373<br>Asians:344              | 48%                         | 43 (18–70)               | Urban               | HPLC     | Africans: 70.9 (51.5–95.1)<br>Asians: 41.8 (28.6–56.8)        |
| Gebreegziabher 2013 <sup>106</sup>    | Rift Valley, Ethiopia      | 202                                     | 0%                          | 30.8 (7.8)               | Rural               | ELISA    | 39.7 ± 9.7                                                    |
| El Maaty 2013 <sup>107</sup>          | Egypt                      | 31                                      | 100%                        | (35–50)                  | Urban               | HPLC     | 78.5 (10.5)                                                   |
| Olama 2013 <sup>108</sup>             | Dakahlia, Egypt            | 50                                      | 0%                          | 33.1                     | Rural               | ELISA    | 46.9 (13.5)                                                   |
| El-Shal 2013 <sup>109</sup>           | Zagazig, Egypt             | 150                                     | 0%                          | 29.3                     | Urban               | HPLC     | 67.9 (11.7)                                                   |
| Emerah 2013 <sup>110</sup>            | Zagazig, Egypt             | 129                                     | 0%                          | 27.14 (20–41)            | Urban               | ELISA    | 38.1 (15.9)                                                   |
| Friis 2013 <sup>111</sup>             | Mwanza, Tanzania           | 347                                     | 58%                         | NA                       | Urban               | CLIA     | 84.4 (25.6)                                                   |
| Ibn Yacoub 2012 <sup>112</sup>        | Rabat, Morocco             | 30                                      | 0%                          | 49.5                     | NA                  | na       | 57.41 (4.18)                                                  |
| Schaalan 2012 <sup>113</sup>          | Cairo, Egypt               | 25                                      | 72%                         | (30–55)                  | Urban               | RIA      | 99.1 (27)                                                     |
| Amukele 2012 <sup>36</sup>            | Malawi                     | 21                                      | –                           | 23 (22–28)               | NA                  | LC–MS/MS | 93.4 (6.5)                                                    |
| Luxwolda 2012 <sup>114</sup>          | Tanzania                   | Maasai: 35<br>Hadzabe: 25               | Maasai: 43%<br>Hadzabe: 84% | 34 (16–65)               | Rural               | LC–MS/MS | Maasai: 119.0 (26.0)<br>Hadzabe: 109.0 (28.0)                 |
| Gawad 2012 <sup>115</sup>             | Mansoura, Egypt            | 55                                      | 27%                         | 38 (26–54)               | Rural and urban     | RIA      | 77.1 (16.2) pmol/L                                            |
| El Maghraoui 2012 <sup>116</sup>      | Rabat, Morocco             | 178                                     | 0%                          | 59 (50–79)               | Urban               | CLIA     | 46.7 (31.9)                                                   |
| Kruger 2011 <sup>117</sup>            | Johannesburg, South Africa | 658                                     | 0%                          | 50 (35–90)               | Rural and urban     | CLIA     | 71.4 (21.9)                                                   |



|                                        |                            |                                               |      |                                                           |                 |          |                                                            |
|----------------------------------------|----------------------------|-----------------------------------------------|------|-----------------------------------------------------------|-----------------|----------|------------------------------------------------------------|
| Nansera 2011 <sup>118</sup>            | Mbarara, Uganda            | 50                                            | 50%  | 27                                                        | NA              | HPLC     | 64.9 (17.5)                                                |
| Glew 2010 <sup>119</sup>               | Gombe, Nigeria             | 51                                            | 43%  | 52 (18–72)                                                | Rural           | LC–MS/MS | 68.0 (3.7)                                                 |
| Allali 2009 <sup>120</sup>             | Rabat, Morocco             | 415                                           | 0%   | 50 (24–77)                                                | Urban           | RIA      | 45.2 (19.7)                                                |
| Yan 2009 <sup>121</sup>                | Keneba, The Gambia         | 30                                            | 50%  | 67 (60–75)                                                | Rural           | RIA      | 68.4 (16.2)                                                |
| Wejse 2007 <sup>122</sup>              | Guinea-Bissau              | 494                                           | 48%  | 37 (15–87)                                                | Urban           | LC–MS/MS | 85.3 (34.8)                                                |
| Alsayed 2007 <sup>123</sup>            | Cairo, Egypt               | 70                                            | 100% | 47.1 (3.1)                                                | Rural and urban | RIA      | 47.1 (3.1)                                                 |
| Meddeb 2005 <sup>124</sup>             | Tunis, Tunisia             | 261                                           | 0%   | 40                                                        | Urban           | RIA      | 40                                                         |
| Njemini 2002 <sup>125</sup>            | Ntam, Cameroon             | 152                                           | 61%  | 66 (60–86)                                                | Rural           | RIA      | 52.7 (19.2)                                                |
| Daniels 2000 <sup>126</sup>            | South Africa               | 14                                            | NA   | NA                                                        | NA              | CPBA     | 43.4 (19.5)                                                |
| Daniels 1997 <sup>127</sup>            | South Africa               | 139                                           | 0%   | 44 (20–64)                                                | NA              | CPBA     | 19.3 (6.8–45.6)                                            |
| Sanchez 1997 <sup>49</sup>             | Maiduguri, Nigeria         | Non-pregnant women: 21<br>Newborn mothers: 10 | 0    | Non-pregnant women 17 (9.32)<br>Newborn mothers:16 (3.35) | NA              | RIA      | Non-pregnant women: 40.2 (9.5)<br>New mothers: 44.4 (22.8) |
| Garabedian 1991 <sup>128</sup>         | Constantine, Algeria       | 84                                            | NA   | NA                                                        | Urban           | NA       | Women: 27.1 (9.4)<br>Infants: 21.3 (11.8)                  |
| Feleke 1999 <sup>129</sup>             | Adis Ababa, Ethiopia       | Pregnant: 31<br>Other adults: 30              | 0%   | 21 (19–40)                                                | Urban           | HPLC     | Pregnant: 25 (17–46)<br>Other adults: 23.5 (18–29)         |
| M'Buyamba-Kabangu 1987 <sup>130</sup>  | Kinshasa, Zaire            | 33                                            | 100% | 31                                                        | Urban           | RIA      | 64.9 (38.9)                                                |
| Okonofua 1986 <sup>53</sup> (mothers)  | Ife, Nigeria               | 30                                            | NA   | NA                                                        | NA              | CPBA     | Mothers: 77.7 (15.8)                                       |
| Markestad 1984 <sup>54</sup> (mothers) | Libya                      | 19                                            | 0%   | (26–45)                                                   | NA              | NA       | 34 (13–75)                                                 |
| Pettifor 1978 <sup>131</sup>           | Johannesburg, South Africa | 264                                           | NA   | 7.9 (1–7)                                                 | Urban           | CPBA     | 73.9                                                       |

\*Data presented is only for healthy participants

<sup>e</sup>25(OH)D levels are presented in mean (SD) or median (IQR).

<sup>a</sup>Vitamin D measurement assays; RIA: Radioimmunoassay; CLIA: Chemiluminescence immunoassays; LC–MS/MS: liquid chromatography-tandem mass spectrometry; HPLC–MS/MS high-performance liquid chromatography-tandem mass spectrometry; HPLC: high-performance liquid chromatography; EIA: Enzyme immunoassay; CPBA: competitive protein-binding assay. Data that were not available were indicated as NA.

**Supplementary Table 5. Mean/median 25(OH)D levels for disease and control groups in case-control studies.**

| Disease      | Study                   | Country       | Disease group     |                                         | Healthy controls   |                                         | p           |
|--------------|-------------------------|---------------|-------------------|-----------------------------------------|--------------------|-----------------------------------------|-------------|
|              |                         |               | n                 | Mean (SD)/median (IQR) 25(OH)D (nmol/L) | n                  | Mean (SD)/median (IQR) 25(OH)D (nmol/L) |             |
| Rickets      | Graff 2004              | Nigeria       | 15                | 37.4 (13.5)                             | 15                 | 72.4 (4.6)                              | <0.0001     |
|              | Oginni 1996a            | Nigeria       | 27                | 43 (5.5)                                | 47                 | 63 (2.6)                                | <0.0001     |
|              | Oginni 1996b            | Nigeria       | 22                | 36 (28)                                 | 20                 | 69 (22)                                 | <0.0001     |
|              | Okonofua 1991           | Nigeria       | 11                | 41 (22, 84)*                            | 12                 | 41 (29, 50)*                            | -           |
|              | Pfützner 1998           | Nigeria       | 20                | 56.4 (11.7)                             | 198                | 64.9 (24.0)                             | 0.12        |
|              | Walter 1997             | Nigeria       | 16                | 14.1 (4.7)                              | 27                 | 24 (7.5)                                | <0.0001     |
|              | Thacher 2000            | Nigeria       | 123               | 32 (22, 40)                             | 123                | 50 (42, 62)*                            | -           |
|              | Jones 2016              | Kenya         | 21                | 19 (15, 37)*                            | 22                 | 70 (54, 85)*                            | -           |
|              | Daniels 2000            | South Africa  | 41                | 37.7 (15.5)                             | 14                 | 43.4 (19.5)                             | <0.0001     |
| Thacher 2014 | Nigeria                 | 190           | 34.9 (5.0, 89.9)* | 257                                     | 49.9 (7.5, 127.3)* | -                                       |             |
| Fractures    | Chutterpaul 2019        | South Africa  | 151               | 39.4 (23.1)                             | 176                | 50.1 (23.3)                             | <0.0001     |
|              | El Maghraoui 2012       | Morocco       | 97                | 33.5 (22)                               | 81                 | 46.7 (31.9)                             | 0.001       |
|              | El Maataoui 2015        | Morocco       | 134               | 39.1 (17.8)                             | 73                 | 32.9 (23.8)                             | 0.035       |
| Tuberculosis | Musarurwa 2017          | Zimbabwe      | 134               | 59.9 (48.7, 73.9)                       | 133                | 53.9 (45.7, 66.1) *                     | -           |
|              | Wejse 2007              | Guinea-Bissau | 362               | 78.3 (22.6)                             | 494                | 85.3 (34.8)                             | <0.0001     |
|              | Ludmir 2016             | Botswana      | 39                | 80.4 (53.7, 99.8)*                      | 41                 | 77.1 (56.4, 104.6)*                     | -           |
|              | Ashenafi 2018           | Ethiopia      | 78                | 38.5                                    | 77                 | 35                                      | -           |
|              | Friis 2013              | Tanzania      | 1223              | 110.9 (35.7)                            | 347                | 84.4 (25.6)                             | <0.0001     |
|              | Boillat-Blanco 2016     | Tanzania      | 280               | 94.0 (26.9)                             | 358                | 89.6 (26.9)                             | 0.041       |
|              | Edem 2016               | Nigeria       | 24                | 44.08 (9.5) pg/ml                       | 20                 | 45.80 (13.30) pg/ml                     | 0.62        |
| HIV          | Hamill 2013             | South Africa  | 74                | 59.2 (16.5)                             | 98                 | 59.7 (16.5)                             | 0.84        |
|              | Velaphi 2019 (mothers)  | South Africa  | 137               | 58.8 (31.2)                             | 152                | 55.5 (28.3)                             | 0.35        |
|              | Velaphi 2019 (children) | South Africa  | 138               | 40.7 (21.2)                             | 151                | 42.8 (20.9)                             | 0.40        |
|              | Were 2014               | Kenya         | 16                | 88.1 (58.2)                             | 23                 | 79.9 (37.4)                             | 0.59        |
|              | Nansera 2011 (HIV only) | Uganda        | 50                | 69.9 (27.5)                             | 50                 | 64.9 (17.5)                             | 0.28        |
|              | Nansera 2011 (HIV+TB)   | Uganda        | 50                | 59.9 (27.5)                             | 50                 | 64.9 (17.5)                             | 0.28        |
|              | Aké 2018                | Ivory Coast   | 120               | 69.9 (5.5)                              | 163                | 77.4 (3.9)                              | <0.0001     |
|              | Chikwati 2019           | Zimbabwe      | 64                | 112 (33.4)                              | 63                 | 100 (27.1)                              | 0.028       |
|              | Musarurwa 2017          | Zimbabwe      | 139               | 50.9 (36.4, 67.1)*                      | 133                | 53.9 (45.7, 66.1)*                      | -           |
| Diabetes     | Abd-Allah 2014          | Egypt         | 120               | 35.5 (12.5)                             | 120                | 46.6 (13.5)                             | <0.0001     |
|              | Abbiyesuku 2016         | Nigeria       | 80                | 91.2 (28.2)                             | 29                 | 107.2 (25.2)                            | 0.0083      |
|              | Azzam 2019              | Egypt         | 40                | 35.0 (17.5)                             | 40                 | 40.3 (21.4)                             | 0.23        |
|              | Bahendeka 2018          | Uganda        | 85                | 116.4 (63.6)                            | 79                 | 99.6 (120.8)                            | 0.26        |
|              | Azab 2013               | Egypt         | 80                | 61.7 (14.0)                             | 40                 | 66.1 (12.0)                             | 0.092       |
|              | Fondjo 2017             | Ghana         | 118               | 6.1 (4.8, 22.3)*                        | 100                | 31.3 (6.5, 81.8)*                       | -           |
|              | Fondjo 2017             | Ghana         | 18                | 6.1 (4.8, 22.3)*                        | 100                | 31.3 (6.5, 81.8)*                       | -           |
|              | Asthma                  | Maalmi 2013   | Tunisia           | 155                                     | 47.1 (16.7)        | 225                                     | 75.6 (14.9) |
| Ali 2017     |                         | Egypt         | 82                | 45.2 (8.7, 136.5)*                      | 33                 | 90.1 (26.9, 189.1)*                     | -           |

|                              |                   |              |     |               |     |               |         |
|------------------------------|-------------------|--------------|-----|---------------|-----|---------------|---------|
|                              | Lahmar 2018       | Nigeria      | 154 | 48.1 (9.5)    | 154 | 70.3 (11.7)   | <0.0001 |
|                              | Omole 2018        | Nigeria      | 103 | 122.8 (18.0)  | 103 | 127.8 (17.2)  | 0.043   |
| Systemic lupus erythematosus | Abdel Galil 2018  | Egypt        | 123 | 64.6 (20.5)   | 100 | 114.4 (22.9)  | <0.0001 |
|                              | Azab 2016         | Egypt        | 100 | 84.1 (3.7)    | 100 | 53.7 (3.0)    | <0.0001 |
|                              | Emerah 2013       | Egypt        | 107 | 27.4 (15.4)   | 129 | 38.1 (15.9)   | <0.0001 |
|                              | Hamza 2011        | Egypt        | 60  | 65.7 (30.1)   | 60  | 106.5 (23.0)  | <0.0001 |
| Hepatitis C virus            | Abdel-Mohsen 2018 | Egypt        | 60  | 111.1 (21.1)  | 30  | 164.7 (7.5)   | <0.0001 |
|                              | Eltayeb 2015      | Egypt        | 66  | 61.58 (17.05) | 28  | 98.31 (3.50)  | <0.0001 |
|                              | Schaalan 2012     | Egypt        | 50  | 37.2 (8.7)    | 25  | 99.1 (27.0)   | <0.0001 |
| Polycystic ovary syndrome    | Bakeer 2018       | Egypt        | 53  | 31.3 (14.9)   | 17  | 48.7 (27.3)   | 0.0013  |
|                              | El-Shal 2013      | Egypt        | 150 | 59.9 (13.0)   | 150 | 67.9 (11.7)   | <0.0001 |
|                              | Bakeer 2018       | Egypt        | 53  | 31.3 (14.9)   | 17  | 48.7 (27.3)   | 0.0013  |
| Cardiovascular diseases      | El Maaty 2013     | Egypt        | 63  | 60.1 (25.8)   | 31  | 78.5 (10.54)  | <0.0001 |
|                              | Derar 2017        | Sudan        | 50  | 46.37 (30.74) | 50  | 51.10 (21.91) | 0.34    |
| Vitiligo                     | Sobeih 2016       | Egypt        | 75  | 43.7 (20.2)   | 75  | 71.9 (26.2)   | <0.0001 |
|                              | Ibrahim 2018      | Egypt        | 80  | 34.64 (3.03)  | 20  | 76.70 (10.73) | <0.0001 |
| Renal diseases               | Cavalier 2019     | Ivory Coast  | 100 | 100.3         | 203 | 64.6          | –       |
|                              | Derar 2017        | Sudan        | 50  | 56.2 (33.6)   | 50  | 51.1 (21.9)   | 0.37    |
| Fibromyalgia                 | Olama 2013        | Egypt        | 50  | 37.7 (15.2)   | 50  | 46.9 (13.5)   | 0.0019  |
| Diarrhoea                    | Hassam 2019       | Tanzania     | 47  | 51.9          | 47  | 47.8          | –       |
| Albinism                     | Van der Walt 2016 | South Africa | 50  | 54.4          | 50  | 45.9          | –       |
| Alopecia areata              | Fattah 2015       | Egypt        | 30  | 45.9 (8.5)    | 30  | 112.8 (51.2)  | <0.0001 |
| Goiter                       | Aboelnaga 2016    | Egypt        | 77  | 60.4 (21.7)   | 50  | 70.8 (27.2)   | 0.019   |
| Graves disease               | Gawad 2012        | Egypt        | 90  | 53.6 (18.5)   | 55  | 77.1 (16.2)   | <0.0001 |
| Malaria                      | Cusick 2014       | Uganda       | 40  | 52.9 (16)     | 20  | 63.1 (17.7)   | 0.001   |
| Malnutrition                 | Nabeta 2015       | Uganda       | 117 | 81.1 (30.0)   | 41  | 80.4 (27.2)   | 0.90    |
| Metabolic syndrome           | Alsayed 2007      | Egypt        | 93  | 40 (11.3)     | 70  | 47.1 (3.1)    | <0.0001 |
| Multiple sclerosis           | Skalli 2018       | Morocco      | 113 | 29.2 (17.4)   | 146 | 32.4 (16.4)   | 0.13    |
| Neural tube defects          | Nasri 2016        | Tunisia      | 68  | 20.65 (10.25) | 64  | 28.30 (13.82) | 0.0004  |
| Pneumonia                    | Albanna 2010      | Egypt        | 40  | 37.6 (21.1)   | 40  | 87.25 (18.4)  | <0.0001 |
| Schizophrenia                | Akinlade 2017     | Nigeria      | 60  | 19.8 (5.1)    | 30  | 28.1 (5.6)    | <0.0001 |
| Systemic sclerosis           | Ibn Yacoub 2012   | Morocco      | 30  | 27.2 (6.7)    | 30  | 57.41 (4.18)  | <0.0001 |
| $\beta$ -thalassemia major   | Fahim 2013        | Egypt        | 100 | 10.4 (4.6)    | 100 | 40.2 (12.3)   | <0.0001 |

\*These are median values (with IQR), the rest are means (SD). Level of significance between the group means was determined using the Student t-test, this was not carried out in studies with only median 25(OH)D concentrations.

**Supplementary Table 6. Seasonality in vitamin D status\***

| Study                 | Country       | Seasonality in 25(OH)Dlevels | Comments                                                              |
|-----------------------|---------------|------------------------------|-----------------------------------------------------------------------|
| Ali 2017              | Egypt         | Yes                          | Lower vitamin D status in winter                                      |
| Allali 2009           | Morocco       | Yes                          | Higher levels during summer                                           |
| Ashenafi 2018         | Ethiopia      | No                           | No seasonal effects on 25(OH)Dlevels                                  |
| Chikwati 2019         | Zimbabwe      | Yes                          | Summer is associated with higher vitamin D status                     |
| Djennane 2014         | Algeria       | Yes                          | Higher prevalence of vitamin D deficiency in winter                   |
| Durazo 2013           | Nigeria       | No                           | No seasonal effects on 25(OH)Dlevels                                  |
| El Rifai 2014         | Egypt         | Yes                          | Higher prevalence of vitamin D deficiency in winter                   |
| Garabedian 1991       | Algeria       | Yes                          | Higher prevalence of vitamin D deficiency in winter and spring        |
| George 2014           | South Africa  | Yes                          | Higher 25(OH)Dlevels in autumn                                        |
| Poopedi 2011          | South Africa  | Yes                          | 25(OH)D levels were highest in summer and autumn                      |
| Poopedi 2015          | South Africa  | No                           | No seasonal effects on 25(OH)Dlevels                                  |
| Sithembiso (in press) | South Africa  | Yes                          | 25(OH)D levels were highest in summer                                 |
| Sotunde 2017          | South Africa  | Yes                          | Higher 25(OH)Dlevels in autumn                                        |
| Sudfeld 2017          | Tanzania      | Yes                          | Higher vitamin D status during December–March and June–August seasons |
| Thacher 200           | Nigeria       | No                           | No seasonal effects on 25(OH)Dlevels                                  |
| Wejse 2007            | Guinea-Bissau | Yes                          | Higher prevalence of vitamin D deficiency prevalence in winter        |
| White 2019            | South Africa  | Yes                          | Higher prevalence of vitamin D deficiency prevalence in winter        |
| Yan 2009              | The Gambia    | No                           | No seasonal effects on 25(OH)Dlevels                                  |

\*This Table includes only studies included in this review that investigated seasonality in vitamin D status in healthy participants.

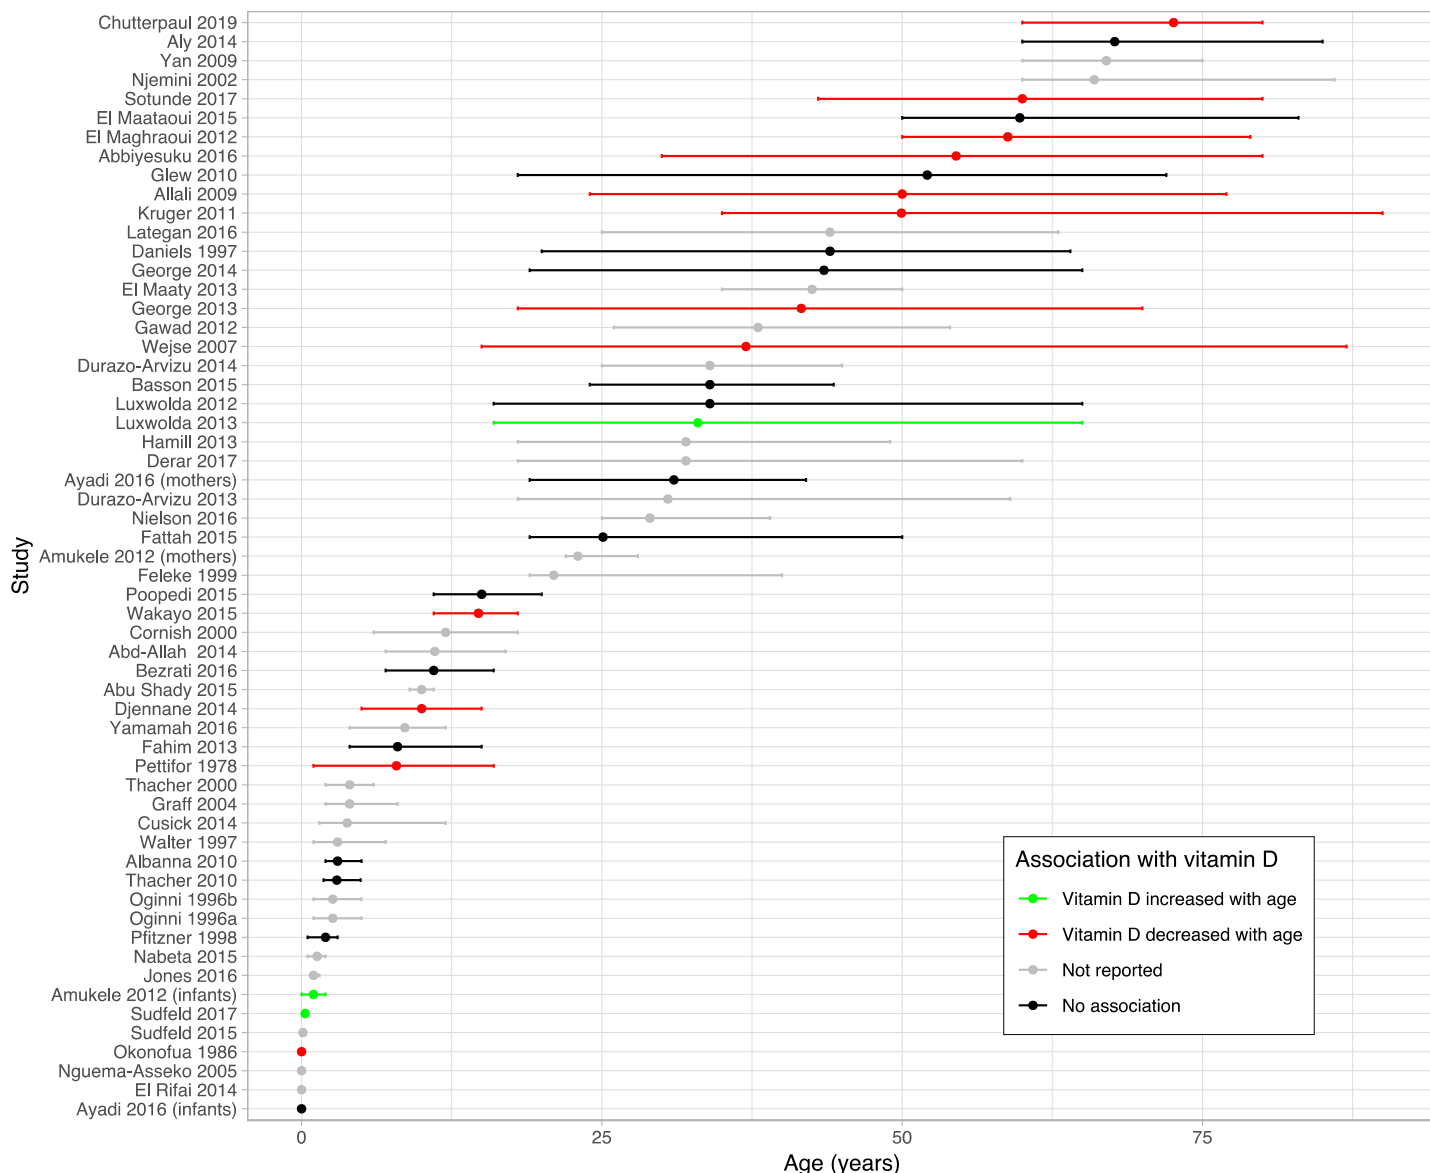

**Supplementary Figure 1. Age of study participants in eligible studies and its association with 25(OH)D levels.** The mean age and range are represented by the midpoints and error bars, respectively. The studies have been sorted by participants' mean age in years. Studies that had a positive association between 25(OH)D levels and age are presented in green, negative associations are presented in red, no association in black, those that did not report any association are shown in grey.

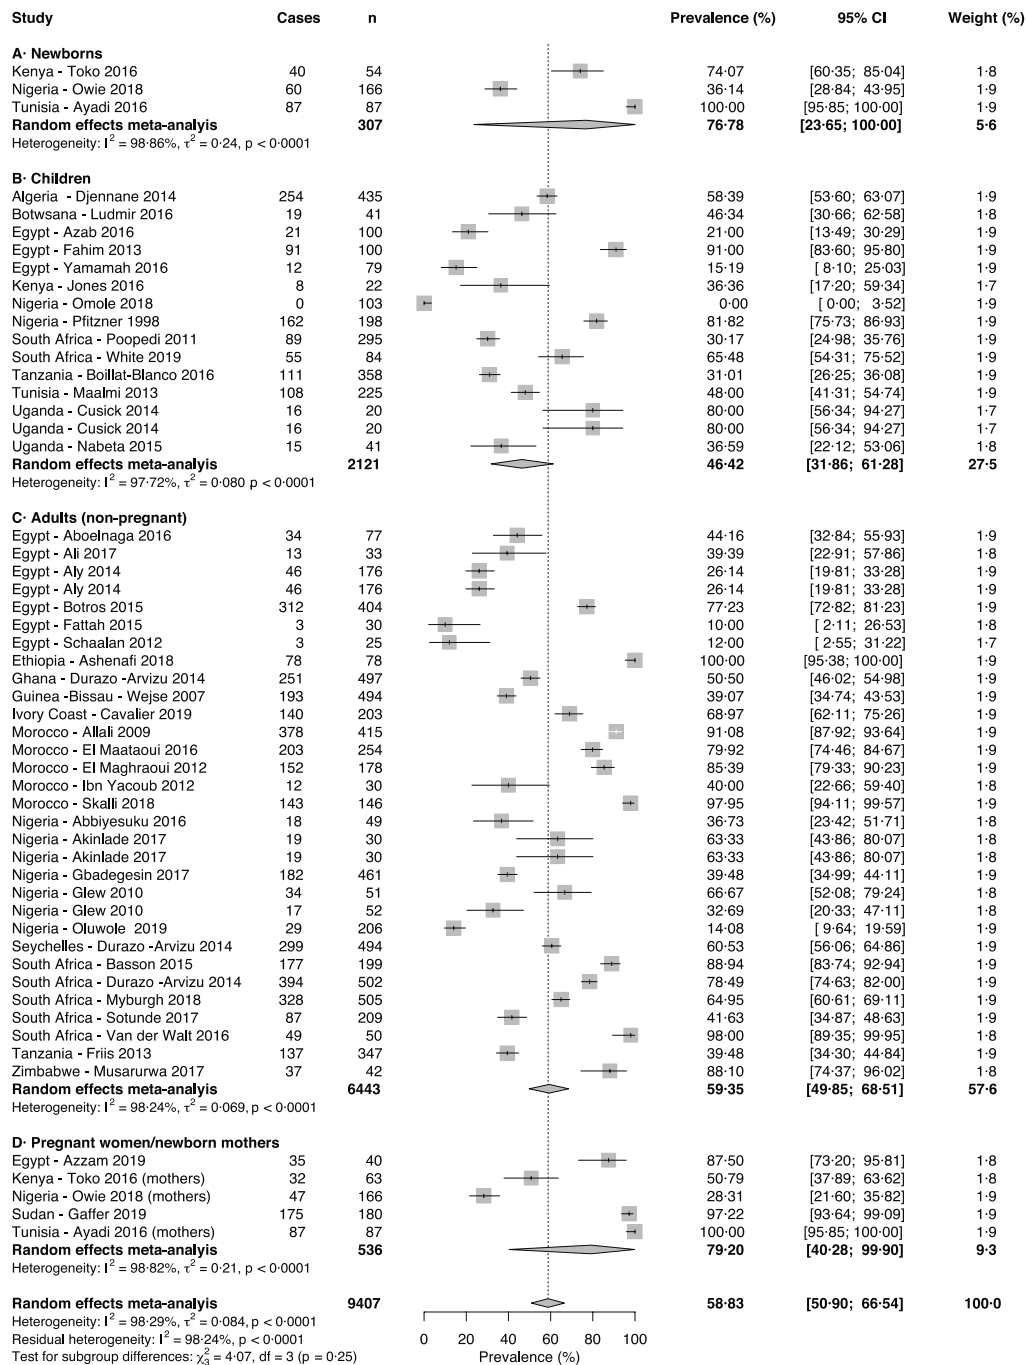

**Supplementary Figure 2. Pooled prevalence of low vitamin D status in the general population in Africa using <75 nmol/L cut-off.** Cases were defined as number of participants in a study with 25(OH)D levels <75 nmol/L and n as the total number of participants in the study.

**A. 75 nmol/L cutoff**

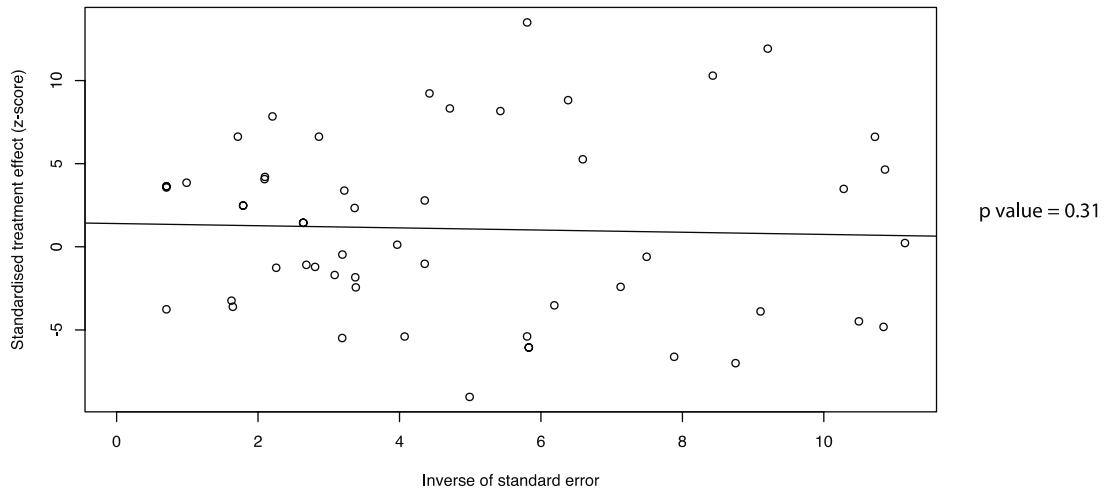

**B. 50 nmol/L cutoff**

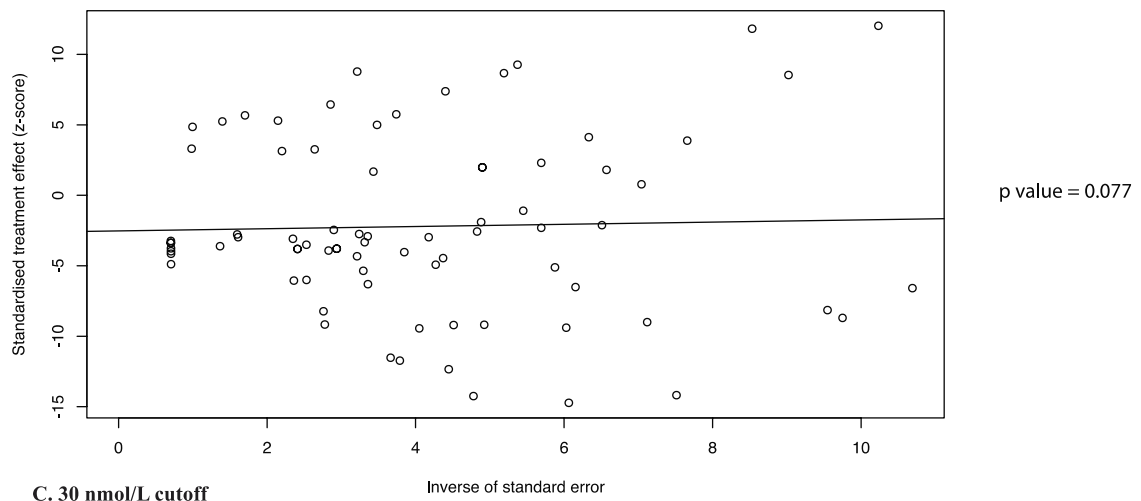

**C. 30 nmol/L cutoff**

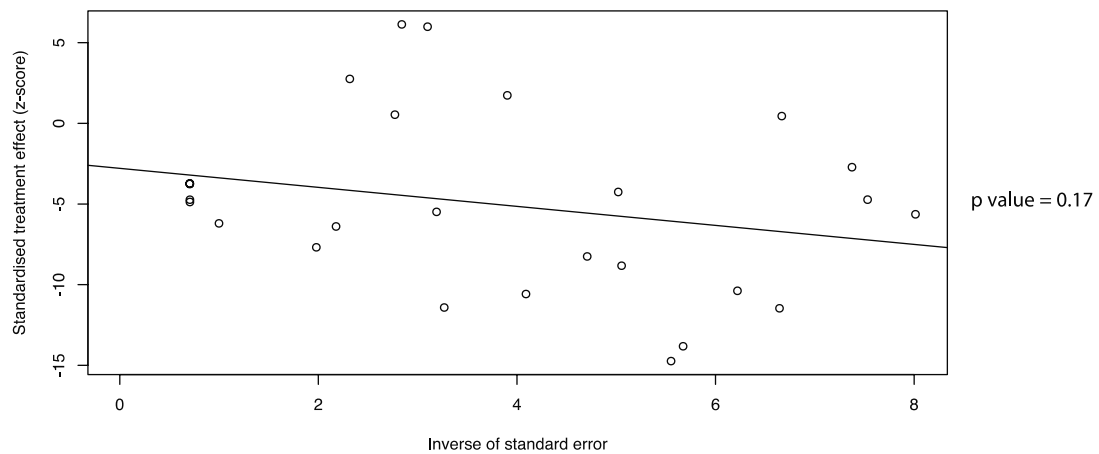

**Supplementary Figure 3. Funnel plot asymmetry tests.** The asymmetry of the funnel plots for the meta-analyses of prevalence was tested using Egger test of bias<sup>133</sup>, where a linear regression method was used.  $P < 0.05$  indicated significant publication bias.

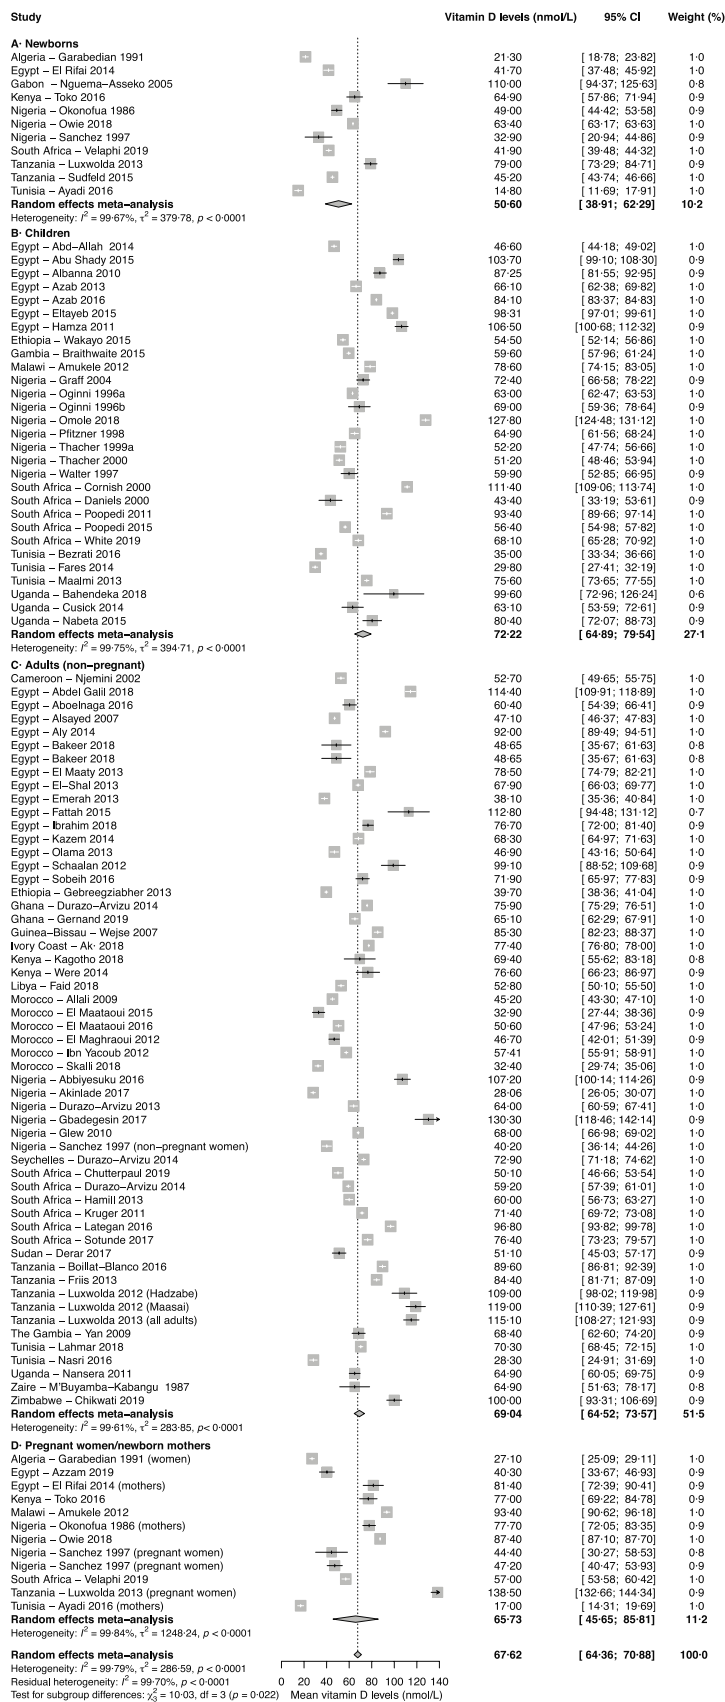

**Supplementary Figure 4. Pooled mean 25(OH)D levels in the general population in Africa stratified by age group. Studies that only reported median 25(OH)D values were excluded from meta-analysis.**



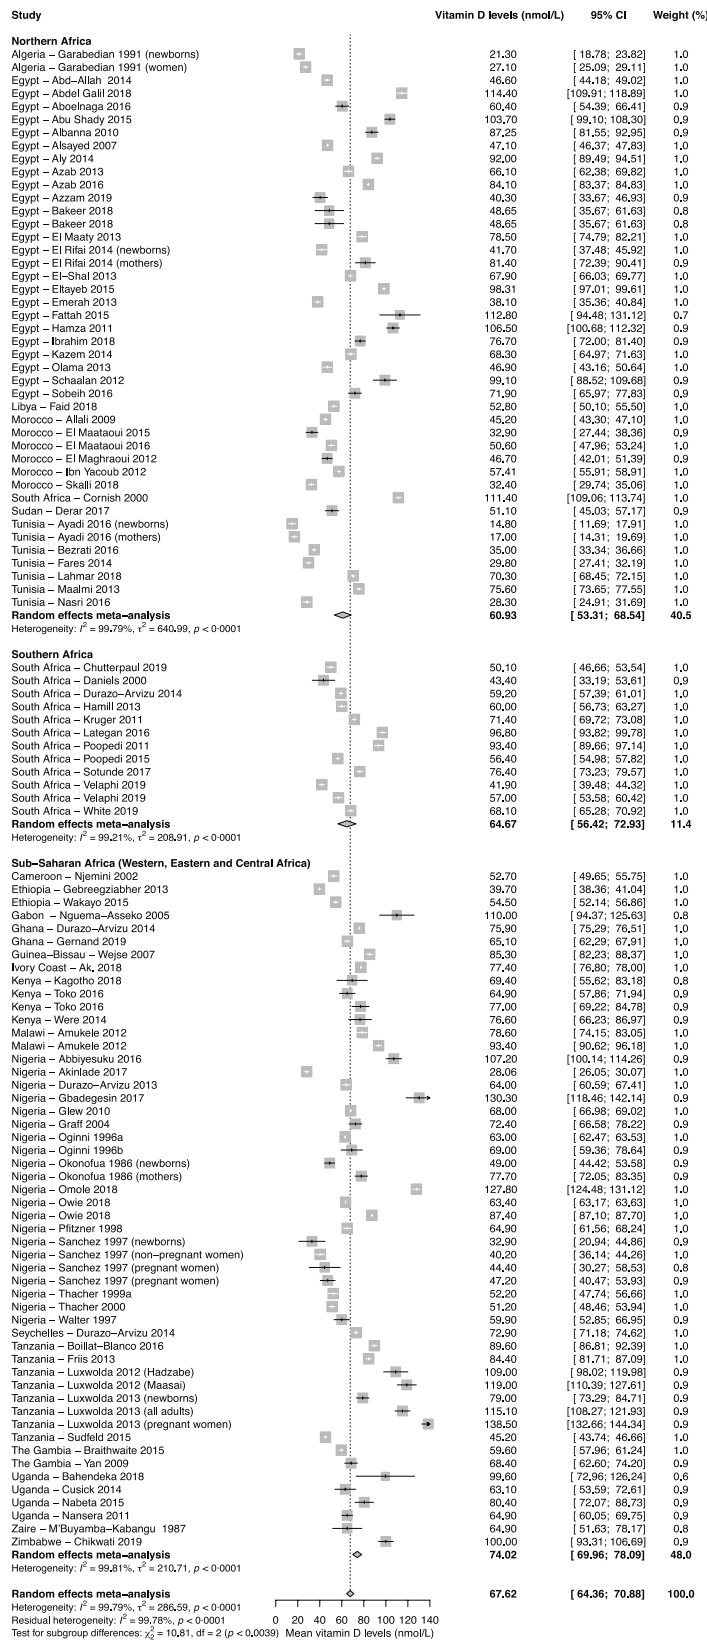

**Supplementary Figure 5. 25(OH)D levels stratified by UN African Regions.** Northern African countries and South Africa were compared with sub-Saharan Africa including West, East and Central African regions.

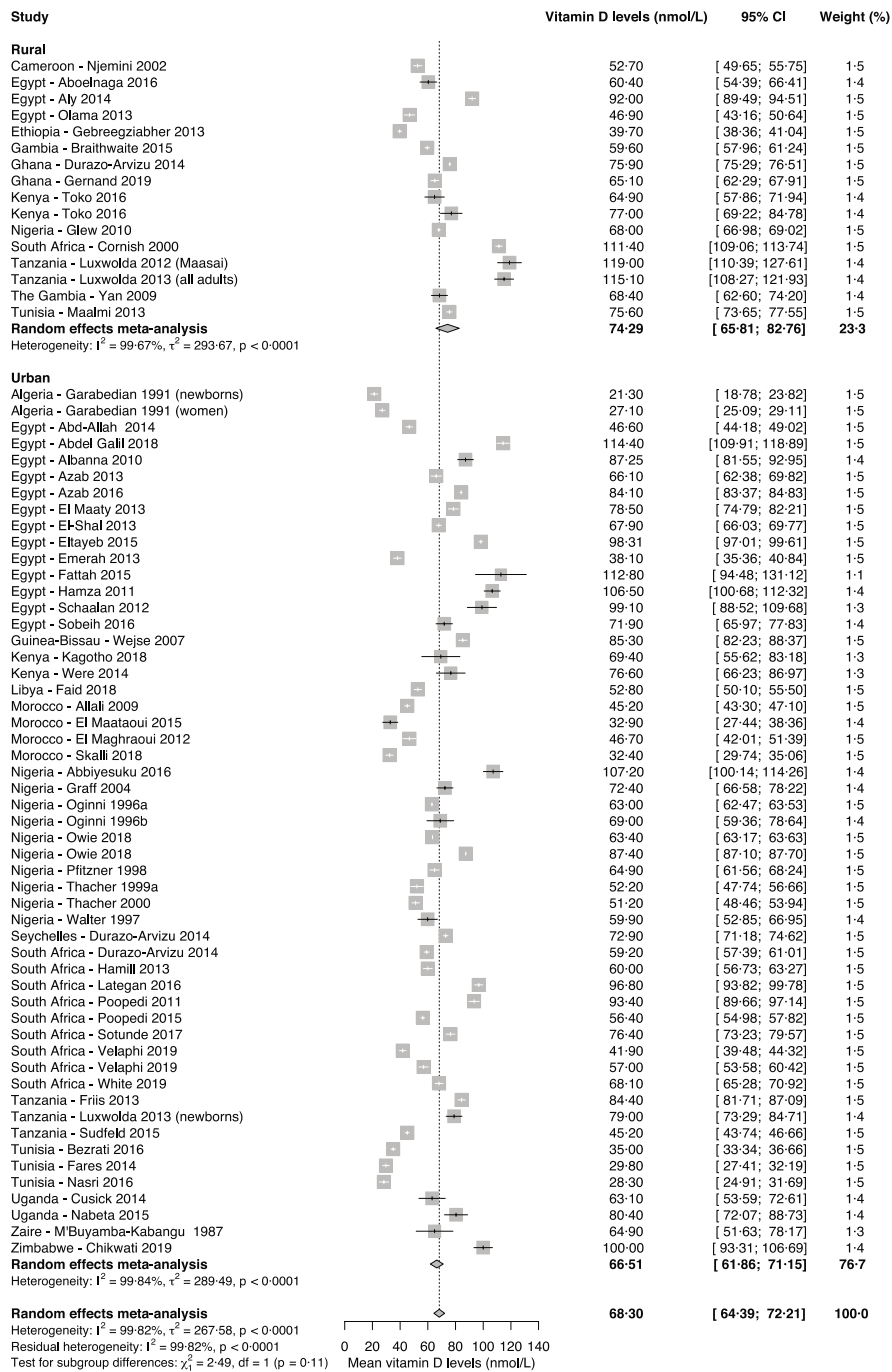

Supplementary Figure 6. 25(OH)D levels stratified by area (rural vs urban)

**A- Mean differences in 25(OH)D levels between men and women from the same study**

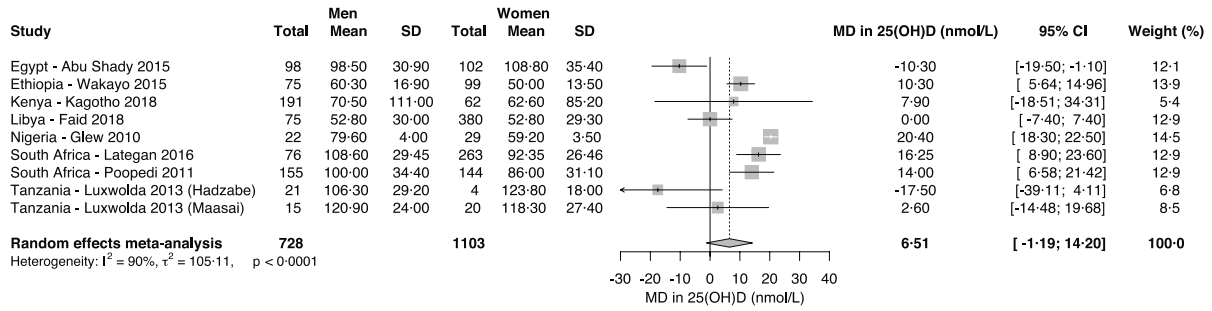

**B- Mean differences in 25(OH)D levels between mothers and their newborns from the same study**

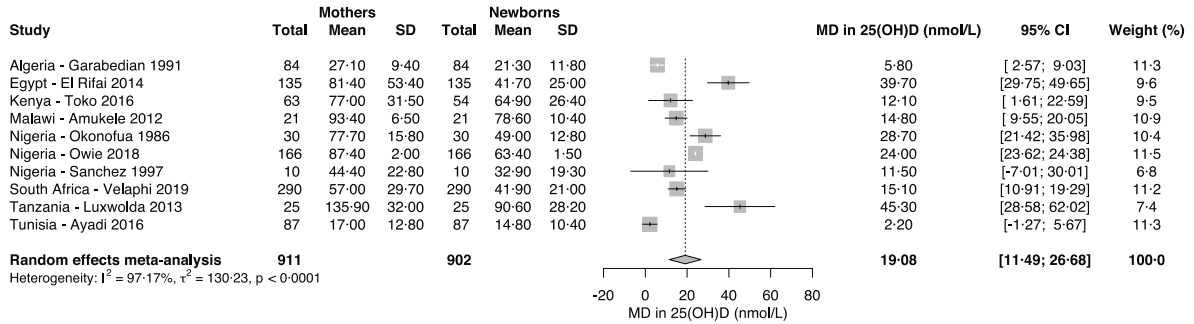

**C- Mean differences in 25(OH)D levels between rural and urban inhabitants from the same study**

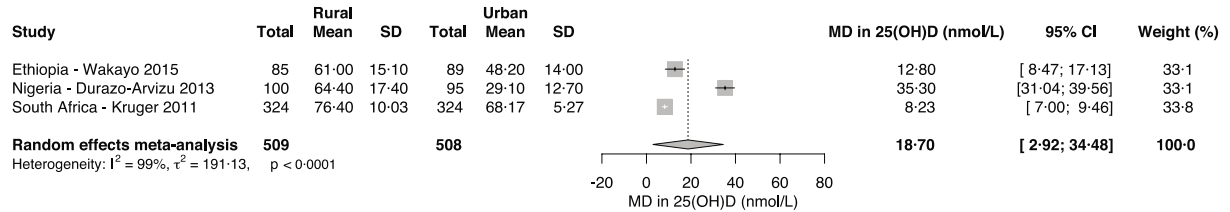

**D- Mean differences in 25(OH)D levels between rickets cases and healthy controls from the same study**

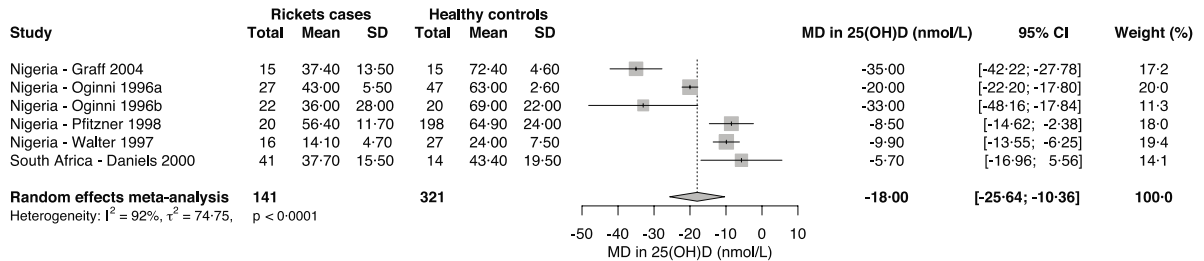

**Supplementary Figure 7. Mean difference (MD) in 25(OH)D levels between men and women (A), between mothers and their infants (B), between rural and urban inhabitants (C), and between rickets cases and healthy controls (D). These were differences in mean 25(OH)D levels between the groups in the same study.**

## References

1. Sithembiso C, Velaphi, Shabir A, Madhi, Alane Izu, et al. Maternal and neonatal vitamin D status at birth in black South Africans. *S Afr Med J* (in press).
2. Hassam I, Kisenge R, Aboud S, et al. Association of vitamin D and diarrhoea in children aged less than five years at Muhimbili national hospital, Dar es Salaam: An unmatched case control study. *BMC Pediatr* 2019; **19**(1): 237.
3. Houghton LA, Brown RC, Beaumont S, et al. Micronutrient status differs among Maasai and Kamba preschoolers in a supplementary feeding programme in Kenya. *Maternal and Child Nutrition* 2019; **15**(3): e12805.
4. Bodin J, Mihret A, Holm-Hansen C, et al. Vitamin D Deficiency is Associated with Increased Use of Antimicrobials among Preschool Girls in Ethiopia. *Nutrients* 2019; **11**(3).
5. White Z, White S, Dalvie T, et al. Bone health, body composition, and vitamin D status of black preadolescent children in South Africa. *Nutrients* 2019; **11**(6): 1243.
6. Owie E, Afolabi BB. Vitamin D deficiency in pregnant women and newborns in Lagos, Nigeria. *J Obstet Gynaecol* 2018; **38**(5): 616-21.
7. Youssef MAM, Zahran AM, Hussien AM, et al. In neonates with vitamin D deficiency, low lymphocyte activation markers are risk factors for infection. *Paediatrics and International Child Health* 2019; **39**(2): 111-8.
8. Omole KO, Kuti BP, Oyelami OA, et al. Serum vitamin D profile of Nigerian children with asthma: Association with asthma severity and control. *Pediatr Pulmonol* 2018; **53**(5): 544-51.
9. Sudfeld CR, Manji KP, Smith ER, et al. Vitamin D Deficiency Is Not Associated With Growth or the Incidence of Common Morbidities Among Tanzanian Infants. *J Pediatr Gastroenterol Nutr* 2017; **65**(4): 467-74.
10. Ayadi ID, Nouaili EB, Talbi E, et al. Prevalence of vitamin D deficiency in mothers and their newborns in a Tunisian population. *Int J Gynaecol Obstet* 2016; **133**(2): 192-5.
11. Jones KDJ, Hachmeister CU, Khasira M, et al. Vitamin D deficiency causes rickets in an urban informal settlement in Kenya and is associated with malnutrition. *Matern Child Nutr* 2018; **14**(1).
12. Bezrati I, Ben Fradj MK, Ouerghi N, et al. Vitamin D inadequacy is widespread in Tunisian active boys and is related to diet but not to adiposity or insulin resistance. *Libyan J Med* 2016; **11**: 31258.
13. Yamamah GA, Abdelhamid EN, Farid TM, et al. Simple screening procedures for evaluation of some health problems in children living at remote areas. *Research Journal of Pharmaceutical, Biological and Chemical Sciences* 2016; **7**(4): 1750-5.
14. Toko EN, Sumba OP, Daud, II, et al. Maternal Vitamin D Status and Adverse Birth Outcomes in Children from Rural Western Kenya. *Nutrients* 2016; **8**(12).
15. Boillat-Blanco N, Bovet P, Ramaiya KL, et al. Association between tuberculosis, diabetes and 25 hydroxyvitamin D in Tanzania: a longitudinal case control study. *BMC Infect Dis* 2016; **16**(1): 626.
16. Ludmir J, Mazhani L, Cary MS, et al. Vitamin D Status in Botswana Children Under 2 Years Old With and Without Active Tuberculosis. *Am J Trop Med Hyg* 2016; **94**(5): 971-4.
17. Eltayeb AA, Abdou MA, Abdel-aal AM, et al. Vitamin D status and viral response to therapy in hepatitis C infected children. *World J Gastroenterol* 2015; **21**(4): 1284-91.
18. Braithwaite VS, Jones KS, Schoenmakers I, et al. Vitamin D binding protein genotype is associated with plasma 25OHD concentration in West African children. *Bone* 2015; **74**: 166-70.
19. Sudfeld CR, Duggan C, Aboud S, et al. Vitamin D status is associated with mortality, morbidity, and growth failure among a prospective cohort of HIV-infected and HIV-exposed Tanzanian infants. *J Nutr* 2015; **145**(1): 121-7.

20. Poopedi MA, Norris SA, Micklesfield LK, et al. Does vitamin D status track through adolescence? *Am J Clin Nutr* 2015; **102**(5): 1025-9.
21. Wakayo T, Belachew T, Vatanparast H, et al. Vitamin D deficiency and its predictors in a country with thirteen months of sunshine: the case of school children in central Ethiopia. *PLoS One* 2015; **10**(3): e0120963.
22. Wakayo T, Belachew T, Whiting SJ. Serum Vitamin D Level Associates With Handgrip Muscle Strength Among Ethiopian Schoolchildren: A Cross-Sectional Study. *Food Nutr Bull* 2018; **39**(1): 54-64.
23. Shady MM, Youssef MM, Shehata MA, et al. Association of Serum 25-Hydroxyvitamin D with Life Style and Dietary Factors in Egyptian Prepubescent Children. *Open Access Maced J Med Sci* 2015; **3**(1): 80-4.
24. Nabeta HW, Kasolo J, Kiggundu RK, et al. Serum vitamin D status in children with protein-energy malnutrition admitted to a national referral hospital in Uganda. *BMC Res Notes* 2015; **8**: 418.
25. Cusick SE, Opoka RO, Lund TC, et al. Vitamin D insufficiency is common in Ugandan children and is associated with severe malaria. *PLoS One* 2014; **9**(12): e113185.
26. Djennane M, Lebbah S, Roux C, et al. Vitamin D status of schoolchildren in Northern Algeria, seasonal variations and determinants of vitamin D deficiency. *Osteoporos Int* 2014; **25**(5): 1493-502.
27. El Rifai NM, Abdel Moety GA, Gaafar HM, et al. Vitamin D deficiency in Egyptian mothers and their neonates and possible related factors. *J Matern Fetal Neonatal Med* 2014; **27**(10): 1064-8.
28. El Sakka AS, Imam SS, Amer HA, et al. Vitamin D deficiency and low hemoglobin level as risk factors for severity of acute lower respiratory tract infections in Egyptian children: A case-control study. *Egyptian Pediatric Association Gazette* 2014; **62**(1): 1-7.
29. Abd-Allah SH, Pasha HF, Hagrass HA, et al. Vitamin D status and vitamin D receptor gene polymorphisms and susceptibility to type 1 diabetes in Egyptian children. *Gene* 2014; **536**(2): 430-4.
30. Fares S, Sethom MM, Khouaja-Mokrani C, et al. Vitamin A, E, and D deficiencies in tunisian very low birth weight neonates: prevalence and risk factors. *Pediatr Neonatol* 2014; **55**(3): 196-201.
31. Thacher TD, Fischer PR, Pettifor JM. The effect of nutritional rickets on bone mineral density. *J Clin Endocrinol Metab* 2014; **99**(11): 4174-80.
32. Maalmi H, Sassi FH, Berraies A, et al. Association of vitamin D receptor gene polymorphisms with susceptibility to asthma in Tunisian children: A case control study. *Hum Immunol* 2013; **74**(2): 234-40.
33. Azab SF, Saleh SH, Elsaeed WF, et al. Vitamin D status in diabetic Egyptian children and adolescents: a case-control study. *Ital J Pediatr* 2013; **39**: 73.
34. Fahim FM, Saad K, Askar EA, et al. Growth Parameters and Vitamin D status in Children with Thalassemia Major in Upper Egypt. *Int J Hematol Oncol Stem Cell Res* 2013; **7**(4): 10-4.
35. Luxwolda MF, Kuipers RS, Kema IP, et al. Vitamin D status indicators in indigenous populations in East Africa. *Eur J Nutr* 2013; **52**(3): 1115-25.
36. Amukele TK, Soko D, Katundu P, et al. Vitamin D levels in Malawian infants from birth to 24 months. *Arch Dis Child* 2013; **98**(3): 180-3.
37. Hamza RT, Awwad KS, Ali MK, et al. Reduced serum concentrations of 25-hydroxy vitamin D in Egyptian patients with systemic lupus erythematosus: relation to disease activity. *Med Sci Monit* 2011; **17**(12): Cr711-8.
38. Poopedi MA, Norris SA, Pettifor JM. Factors influencing the vitamin D status of 10-year-old urban South African children. *Public Health Nutr* 2011; **14**(2): 334--9.

39. Thacher TD, Fischer PR, Obadofin MO, et al. Comparison of metabolism of vitamins D2 and D3 in children with nutritional rickets. *J Bone Miner Res* 2010; **25**(9): 1988-95.
40. Albanna EAM, Ali YF, Reayid AM. Vitamin D and LL-37 in children with pneumonia. *Egypt J Pediatr Allergy Immunol* 2010; **8**(2): 81--6.
41. Nguema-Asseko B, Ganga-Zandzou PS, Ovono F, et al. [Vitamin D status in Gabonese children]. *Archives de pediatrie : organe officiel de la Societe francaise de pediatrie* 2005; **12**(11): 1587-90.
42. Graff M, Thacher TD, Fischer PR, et al. Calcium absorption in Nigerian children with rickets. *Am J Clin Nutr* 2004; **80**(5): 1415-21.
43. Thacher TD, Fischer PR, Pettifor JM, et al. Case-control study of factors associated with nutritional rickets in Nigerian children. *J Pediatr* 2000; **137**(3): 367-73.
44. Thacher TD, Fischer PR, Pettifor JM, et al. A comparison of calcium, vitamin D, or both for nutritional rickets in Nigerian children. *N Engl J Med* 1999; **341**(8): 563-8.
45. Thacher T, Glew RH, Isichei C, et al. Rickets in Nigerian children: response to calcium supplementation. *J Trop Pediatr* 1999; **45**(4): 202-7.
46. Pfitzner MA, Thacher TD, Pettifor JM, et al. Absence of vitamin D deficiency in young Nigerian children. *J Pediatr* 1998; **133**(6): 740-4.
47. Cornish DA, Maluleke V, Mhlanga T. An investigation into a possible relationship between vitamin D, parathyroid hormone, calcium and magnesium in a normally pigmented and an albino rural black population in the Northern Province of South Africa. *Biofactors* 2000; **11**(1-2): 35-8.
48. Walter EA, Scariano JK, Easington CR, et al. Rickets and protein malnutrition in northern Nigeria. *J Trop Pediatr* 1997; **43**(2): 98-102.
49. Sanchez PA, Idrisa A, Bobzom DN, et al. Calcium and vitamin D status of pregnant teenagers in Maiduguri, Nigeria. *J Natl Med Assoc* 1997; **89**(12): 805-11.
50. Oginni LM, Worsfold M, Sharp CA, et al. Plasma osteocalcin in healthy Nigerian children and in children with calcium-deficiency rickets. *Calcif Tissue Int* 1996; **59**(6): 424-7.
51. Oginni LM, Worsfold M, Oyelami OA, et al. Etiology of rickets in Nigerian children. *J Pediatr* 1996; **128**(5 Pt 1): 692-4.
52. Okonofua F, Gill DS, Alabi ZO, et al. Rickets in Nigerian children: a consequence of calcium malnutrition. *Metabolism* 1991; **40**(2): 209-13.
53. Okonofua F, Houlder S, Bell J, et al. Vitamin D nutrition in pregnant Nigerian women at term and their newborn infants. *J Clin Pathol* 1986; **39**(6): 650-3.
54. Markestad T, Elzouki A, Legnain M, et al. Serum concentrations of vitamin D metabolites in maternal and umbilical cord blood of Libyan and Norwegian women. *Hum Nutr Clin Nutr* 1984; **38**(1): 55-62.
55. Oluwole AA, Okunade KS, Okojie OE. Maternal serum vitamin D levels and preterm delivery among low-risk parturients in Lagos, Nigeria. *Int J Gynaecol Obstet* 2019; **144**(2): 216-20.
56. Azzam EZ, El-Aghoury AA, Abd El-naby ESE, et al. Studying the relation between vitamin D deficiency and glycemic state among pregnant women with gestational diabetes. *Diabetes and Metabolic Syndrome: Clinical Research and Reviews* 2019; **13**(2): 1505-9.
57. Cavalier E, Sagou Yayo E, Attoungbre-Hauhouot ML, et al. Vitamin D, bone alkaline phosphatase and parathyroid hormone in healthy subjects and haemodialysed patients from West Africa: impact of reference ranges and parathyroid hormone generation assays on the KDIGO guidelines. *Clinical Kidney Journal* 2018; **12**(2): 288-93.
58. Chikwati RP, Musarurwa C, Duri K, et al. Maternal plasma vitamin D levels and associated determinants in late pregnancy in Harare, Zimbabwe: A cross-sectional study. *BMC Pregnancy Childbirth* 2019; **19**(1): 218.

59. Chutterpaul P, Paruk F, Cassim B. Prevalence of Vitamin D deficiency in older South Africans with and without hip fractures and the effects of age, body weight, ethnicity and functional status. *Journal of Endocrinology, Metabolism and Diabetes of South Africa* 2019; **24**(1): 10-5.
60. Gaffer AA, Rayis DA, Elhoussein OG, et al. Vitamin D status in Sudanese pregnant women: a cross-sectional study. *Trans R Soc Trop Med Hyg* 2019.
61. Gernand AD, Aguree S, Pobee R, et al. Concurrent Micronutrient Deficiencies Are Low and Micronutrient Status Is Not Related to Common Health Indicators in Ghanaian Women Expecting to Become Pregnant. *Current Developments in Nutrition* 2019; **3**(6): nzz053.
62. Younouss AAMB, Moor VJA, Bidjoni LB, et al. Vitamin D deficiency in pregnant women attending prenatal consultations in Yaounde (Cameroon). *Clin Chim Acta* 2019; **493**(Supplement 1): S619.
63. Myburgh PH, Towers GW, Kruger IM, et al. CRP Genotypes Predict Increased Risk to Co-Present with Low Vitamin D and Elevated CRP in a Group of Healthy Black South African Women. *Int J Environ Res Public Health* 2018; **15**(1).
64. Kagotho E, Omuse G, Okinda N, et al. Vitamin D status in healthy black African adults at a tertiary hospital in Nairobi, Kenya: a cross sectional study. *BMC Endocr Disord* 2018; **18**(1): 70.
65. Faid F, Nikolic M, Milesevic J, et al. Assessment of vitamin D intake among Libyan women - adaptation and validation of specific food frequency questionnaire. *Libyan J Med* 2018; **13**(1): 1502028.
66. Ibrahim H, El Taieb M, El Gamel Z, et al. Effect of narrow-band ultraviolet B on the serum of 25-hydroxyvitamin D in vitiligo patients. *J Cosmet Dermatol* 2018; **17**(5): 911-6.
67. Ashenafi S, Mazurek J, Rehn A, et al. Vitamin D(3) Status and the Association with Human Cathelicidin Expression in Patients with Different Clinical Forms of Active Tuberculosis. *Nutrients* 2018; **10**(6).
68. Skalli A, Ait Ben Haddou EH, El Jaoudi R, et al. Association of vitamin D status with multiple sclerosis in a case-control study from Morocco. *Rev Neurol (Paris)* 2018; **174**(3): 150-6.
69. Lahmar O, Salhi M, Kaabachi W, et al. Association Between Vitamin D Metabolism Gene Polymorphisms and Risk of Tunisian Adults' Asthma. *Lung* 2018; **196**(3): 285-95.
70. Aké AJA, Boyvin L, Séri KL, et al. Metabolic Disorders of Vitamin D and Parathyroid Hormone in Patients Living with Human Immunodeficiency Virus Type 1 Taking Antiretroviral Treatment in Côte d'Ivoire. *International STD Research & Reviews* 2018; **7**(2): 1-10.
71. Bahendeka S, Wesonga R, Were TP, et al. Autoantibodies and HLA class II DR-DQ genotypes in Ugandan children and adolescents with type 1 diabetes mellitus. *Int J Diabetes Dev Ctries* 2019; **39**(1): 39-46.
72. Bakeer E, Radwan R, El Mandoury A, et al. Anti-Müllerian Hormone as a Diagnostic Marker in Egyptian Infertile Polycystic Ovary Syndrome Females: Correlations with Vitamin D, Total Testosterone, Dyslipidemia and Anthropometric Parameters. *Journal of Medical Biochemistry* 2018; **37**(4): 448-55.
73. Fondjo LA, Owiredu W, Sakyi SA, et al. Vitamin D status and its association with insulin resistance among type 2 diabetics: A case -control study in Ghana. *PLoS One* 2017; **12**(4): e0175388.
74. Ali AM, Selim S, Abbassi MM, et al. Effect of alfacalcidol on the pulmonary function of adult asthmatic patients: A randomized trial. *Ann Allergy Asthma Immunol* 2017; **118**(5): 557-63.

75. Musa IR, Rayis DA, Ahmed MA, et al. Thyroid Function and 25 (OH) Vitamin D Level among Sudanese Women in Early Pregnancy. *Open Access Macedonian Journal of Medical Sciences* 2018; **6**(3): 488-92.
76. Abdel Galil SM, El-Shafey AM, Abdul-Maksoud RS, et al. Interferon alpha gene expression and serum level association with low vitamin D levels in Egyptian female patients with systemic lupus erythematosus. *Lupus* 2018; **27**(2): 199-209.
77. Sotunde OF, Kruger HS, Wright HH, et al. Association of 25-hydroxyvitamin D and parathyroid hormone with the metabolic syndrome in black South African women. *Appl Physiol Nutr Metab* 2017; **42**(4): 413-9.
78. Akinlade KS, Olaniyan OA, Lasebikan VO, et al. Vitamin D Levels in Different Severity Groups of Schizophrenia. *Front Psychiatry* 2017; **8**(JUN): 105.
79. Gbadegesin A, Sobande A, Adedeji O, et al. Maternal serum vitamin D levels and pregnancy outcomes: from Lagos, Nigeria. *J Obstet Gynaecol* 2017; **37**(1): 25-8.
80. Derar TMO, Gader AGMA, Kordofani AAY, et al. Role of cystathionine beta synthase gene variant in sudanese population. *Biomedical Research (India)* 2017; **28**(13): 6059-63.
81. Musarurwa C, Zijenah LS, Duri DZ, et al. Association of high serum vitamin D concentrations with active pulmonary TB in an HIV co-endemic setting, Harare, Zimbabwe. *BMC Infect Dis* 2017; **17**(1): 142.
82. Nielson CM, Jones KS, Chun RF, et al. Free 25-Hydroxyvitamin D: Impact of Vitamin D Binding Protein Assays on Racial-Genotypic Associations. *The Journal of Clinical Endocrinology & Metabolism* 2016; **101**(5): 2226-34.
83. Lategan R, Van den Berg VL, Ilich JZ, et al. Vitamin D status, hypertension and body mass index in an urban black community in Mangaung, South Africa. *Afr J Prim Health Care Fam Med* 2016; **8**(1): e1-e5.
84. El Maataoui A, Biaz A, El Machtani S, et al. Vitamin D status in healthy Moroccan men and women aged 50 years and older: a cross-sectional study. *Arch Osteoporos* 2016; **11**(1): 24.
85. Edem VF, Ige O, Arinola OG. Plasma vitamins and essential trace elements in multi-drug resistant tuberculosis patients before and during chemotherapy. *Egyptian Journal of Chest Diseases and Tuberculosis* 2016; **65**(2): 441-5.
86. Abbiyesuku F, Olawale O, Agbakwuru A, et al. Vitamin D Levels and Insulin Resistance among Nigerian Men with Type-2 Diabetes mellitus. *Annals of Health Research* 2016; **2**(1): 10-6.
87. Aboelnaga MM, Elshafei MM, Elsayed E. Vitamin D status in Egyptian euthyroid multinodular non-toxic goiter patients and its correlation with TSH levels. *Endocrinol Nutr* 2016; **63**(8): 380-6.
88. Van der Walt JE, Sinclair W. Vitamin D levels in patients with albinism compared with those in normally pigmented Black patients attending dermatology clinics in the Free State province, South Africa. *Int J Dermatol* 2016; **55**(9): 1014-9.
89. Azab SF, Ali YF, Farghaly MA, et al. Vitamin D receptor gene BsmI polymorphisms in Egyptian children and adolescents with systemic lupus erythematosus: A case-control study. *Medicine (Baltimore)* 2016; **95**(46): e5233.
90. Ben Fradj MK, Gargouri MM, Hammami MB, et al. Bladder Cancer is Associated with Low Plasma 25-hydroxyvitamin D Concentrations in Tunisian Population. *Nutr Cancer* 2016; **68**(2): 208-13.
91. Nasri K, Ben Fradj MK, Feki M, et al. Maternal 25-hydroxyvitamin D level and the occurrence of neural tube defects in Tunisia. *Int J Gynaecol Obstet* 2016; **134**(2): 131-4.



92. Sobeih S, Mashaly HM, Gawdat H, et al. Evaluation of the correlation between serum levels of vitamin D and vitamin D receptor gene polymorphisms in an Egyptian population. *Int J Dermatol* 2016; **55**(12): 1329-35.
93. Basson A, Swart R, Jordaan E, et al. Vitamin D deficiency increases the risk for moderate to severe disease activity in Crohn's disease patients in South Africa, measured by the Harvey Bradshaw Index. *South African Gastroenterology Review* 2015; **13**(2): 50.
94. Abdel Fattah NSA, Darwish YW. Assessment of serum 25-hydroxyvitamin D levels in patients with extensive/recalcitrant alopecia areata before and after PUVA and NB-UVB therapy. *Journal of the Egyptian Women's Dermatologic Society* 2015; **12**(1): 19-23.
95. Botros RM, Sabry IM, Abdelbaky RS, et al. Vitamin D deficiency among healthy Egyptian females. *Endocrinol Nutr* 2015; **62**(7): 314-21.
96. El Maataoui A, El Maghraoui A, Biaz A, et al. Relationships between vertebral fractures, sex hormones and vitamin D in Moroccan postmenopausal women: a cross sectional study. *BMC Womens Health* 2015; **15**: 41.
97. Kazem YI, Moaty MIA, El-Shebini SM, et al. Low Vitamin D Serum Levels May Be a Modifiable Risk Factor for Obesity and Cognitive Impairment in Middle-Age Egyptian Women. *Open Access Macedonian Journal of Medical Sciences* 2014; **2**(2): 283-8.
98. Durazo-Arvizu RA, Camacho P, Bovet P, et al. 25-Hydroxyvitamin D in African-origin populations at varying latitudes challenges the construct of a physiologic norm. *Am J Clin Nutr* 2014; **100**(3): 908-14.
99. George JA, Micklesfield LK, Norris SA, et al. The association between body composition, 25(OH)D, and PTH and bone mineral density in black African and Asian Indian population groups. *J Clin Endocrinol Metab* 2014; **99**(6): 2146-54.
100. George JA, Norris SA, van Deventer HE, et al. Effect of adiposity, season, diet and calcium or vitamin D supplementation on the vitamin D status of healthy urban African and Asian-Indian adults. *Br J Nutr* 2014; **112**(4): 590-9.
101. Were T, Wesongah JO, Munde E, et al. Clinical chemistry profiles in injection heroin users from Coastal Region, Kenya. *BMC Clin Pathol* 2014; **14**(1): 32.
102. Aly WW, Hussein MA, Moahamed Ebeid S, et al. Prevalence of vitamin D insufficiency among community dwelling elderly in Dakahlia as a representative of rural areas in Egypt. *Aging Clin Exp Res* 2014; **26**(1): 47-51.
103. Durazo-Arvizu RA, Aloia JF, Dugas LR, et al. 25-hydroxyvitamin D levels in African American and Nigerian women. *Am J Hum Biol* 2013; **25**(4): 560-2.
104. Hamill MM, Ward KA, Pettifor JM, et al. Bone mass, body composition and vitamin D status of ARV-naive, urban, black South African women with HIV infection, stratified by CD(4) count. *Osteoporos Int* 2013; **24**(11): 2855-61.
105. George JA, Norris SA, van Deventer HE, et al. The association of 25 hydroxyvitamin D and parathyroid hormone with metabolic syndrome in two ethnic groups in South Africa. *PLoS One* 2013; **8**(4): e61282.
106. Gebreegziabher T, Stoecker BJ. Vitamin D insufficiency in a sunshine-sufficient area: southern Ethiopia. *Food Nutr Bull* 2013; **34**(4): 429-33.
107. Abu el Maaty MA, Hanafi RS, El Badawy S, et al. Association of suboptimal 25-hydroxyvitamin D levels with knee osteoarthritis incidence in post-menopausal Egyptian women. *Rheumatol Int* 2013; **33**(11): 2903-7.
108. Olama SM, Senna MK, Elarman MM, et al. Serum vitamin D level and bone mineral density in premenopausal Egyptian women with fibromyalgia. *Rheumatol Int* 2013; **33**(1): 185-92.
109. El-Shal AS, Shalaby SM, Aly NM, et al. Genetic variation in the vitamin D receptor gene and vitamin D serum levels in Egyptian women with polycystic ovary syndrome. *Mol Biol Rep* 2013; **40**(11): 6063-73.

110. Emerah AA, El-Shal AS. Role of vitamin D receptor gene polymorphisms and serum 25-hydroxyvitamin D level in Egyptian female patients with systemic lupus erythematosus. *Mol Biol Rep* 2013; **40**(11): 6151-62.
111. Friis H, Range N, Changalucha J, et al. Vitamin D status among pulmonary TB patients and non-TB controls: a cross-sectional study from Mwanza, Tanzania. *PLoS One* 2013; **8**(12): e81142.
112. Ibn Yacoub Y, Amine B, Laatiris A, et al. Bone density in Moroccan women with systemic scleroderma and its relationships with disease-related parameters and vitamin D status. *Rheumatol Int* 2012; **32**(10): 3143-8.
113. Schaalán MF, Mohamed WA, Amin HH. Vitamin D deficiency: correlation to interleukin-17, interleukin-23 and PIIINP in hepatitis C virus genotype 4. *World J Gastroenterol* 2012; **18**(28): 3738-44.
114. Luxwolda MF, Kuipers RS, Kema IP, et al. Traditionally living populations in East Africa have a mean serum 25-hydroxyvitamin D concentration of 115 nmol/l. *Br J Nutr* 2012; **108**(9): 1557-61.
115. Abd El Gawad SS, Abdul Samee ER, Metwali AA, et al. Vitamin D receptor gene polymorphism and its association with 1,25-dihydroxyvitamin D(3) in patients with Graves disease in an Egyptian population: a pilot study. *Endocr Pract* 2012; **18**(2): 132-9.
116. El Maghraoui A, Ouzzif Z, Mounach A, et al. Hypovitaminosis D and prevalent asymptomatic vertebral fractures in Moroccan postmenopausal women. *BMC Womens Health* 2012; **12**: 11.
117. Kruger MC, Kruger IM, Wentzel-Viljoen E, et al. Urbanization of black South African women may increase risk of low bone mass due to low vitamin D status, low calcium intake, and high bone turnover. *Nutr Res* 2011; **31**(10): 748-58.
118. Nansera D, Graziano FM, Friedman DJ, et al. Vitamin D and calcium levels in Ugandan adults with human immunodeficiency virus and tuberculosis. *Int J Tuberc Lung Dis* 2011; **15**(11): 1522-7, i.
119. Glew RH, Crossey MJ, Polanams J, et al. Vitamin D status of seminomadic Fulani men and women. *J Natl Med Assoc* 2010; **102**(6): 485-90.
120. Allali F, El Aichaoui S, Khazani H, et al. High prevalence of hypovitaminosis D in Morocco: relationship to lifestyle, physical performance, bone markers, and bone mineral density. *Semin Arthritis Rheum* 2009; **38**(6): 444-51.
121. Yan L, Schoenmakers I, Zhou B, et al. Ethnic differences in parathyroid hormone secretion and mineral metabolism in response to oral phosphate administration. *Bone* 2009; **45**(2): 238-45.
122. Wejse C, Olesen R, Rabna P, et al. Serum 25-hydroxyvitamin D in a West African population of tuberculosis patients and unmatched healthy controls. *Am J Clin Nutr* 2007; **86**(5): 1376-83.
123. Alsayed A, Gad A, Azab A. Serum 25-hydroxyvitamin D concentrations and metabolic syndrome in Egyptian men. *Journal of Medical Sciences* 2007; **7**(5): 850-4.
124. Meddeb N, Sahli H, Chahed M, et al. Vitamin D deficiency in Tunisia. *Osteoporos Int* 2005; **16**(2): 180-3.
125. Njemini R, Meyers I, Demanet C, et al. The prevalence of autoantibodies in an elderly sub-Saharan African population. *Clin Exp Immunol* 2002; **127**(1): 99-106.
126. Daniels ED, Pettifor JM, Moodley GP. Serum osteocalcin has limited usefulness as a diagnostic marker for rickets. *Eur J Pediatr* 2000; **159**(10): 730-3.
127. Daniels ED, Pettifor JM, Schnitzler CM, et al. Differences in mineral homeostasis, volumetric bone mass and femoral neck axis length in black and white South African women. *Osteoporos Int* 1997; **7**(2): 105-12.

128. Garabedian M, Ben-Mekhbi H. Is vitamin D-deficiency rickets a public health problem in France and Algeria? Nestle nutrition workshop series (USA); 1991; 1991.
129. Feleke Y, Abdulkadir J, Mshana R, et al. Low levels of serum calcidiol in an African population compared to a North European population. *Eur J Endocrinol* 1999; **141**(4): 358-60.
130. M'Buyamba-Kabangu JR, Fagard R, Lijnen P, et al. Calcium, vitamin D-endocrine system, and parathyroid hormone in black and white males. *Calcified tissue international* 1987; **41**(2): 70-4.
131. Pettifor JM, Ross FP, Moodley G, et al. Serum calcium, magnesium, phosphorus, alkaline phosphatase and 25-hydroxyvitamin D concentrations in children. *S Afr Med J* 1978; **53**(19): 751-4.
132. Viechtbauer W, Cheung MWL. Outlier and influence diagnostics for meta-analysis. *Research synthesis methods* 2010; **1**(2): 112-25.
133. Egger M, Davey Smith G, Schneider M, et al. Bias in meta-analysis detected by a simple, graphical test. *BMJ* 1997; **315**(7109): 629-34.
